# Supplementary material
Source: PubMed Central journal article supplement (PMC3817560)
Supplement: NIHMS516415-supplement-01.pdf [file NIHMS516415-supplement-01.pdf]

## Supplemental Data

A

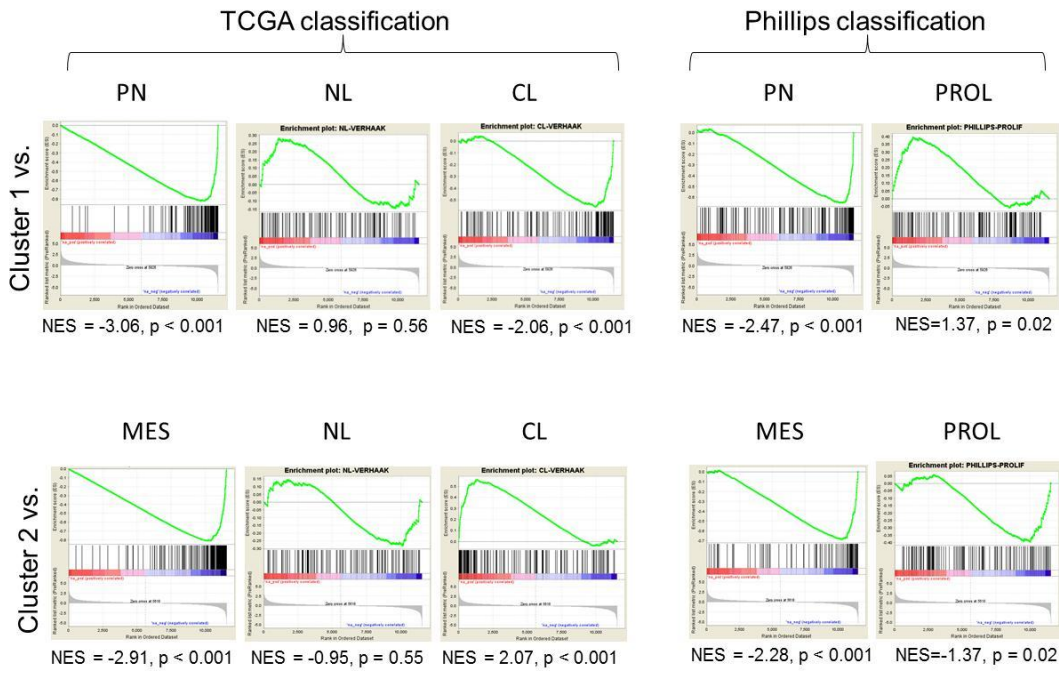

C

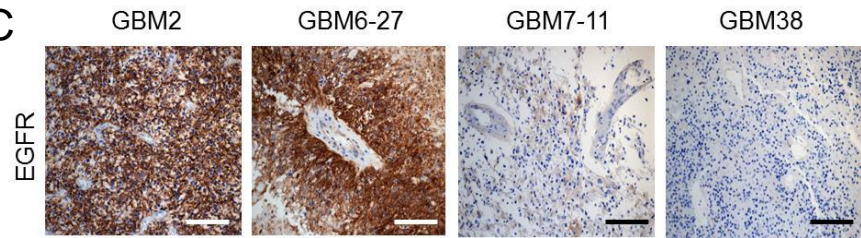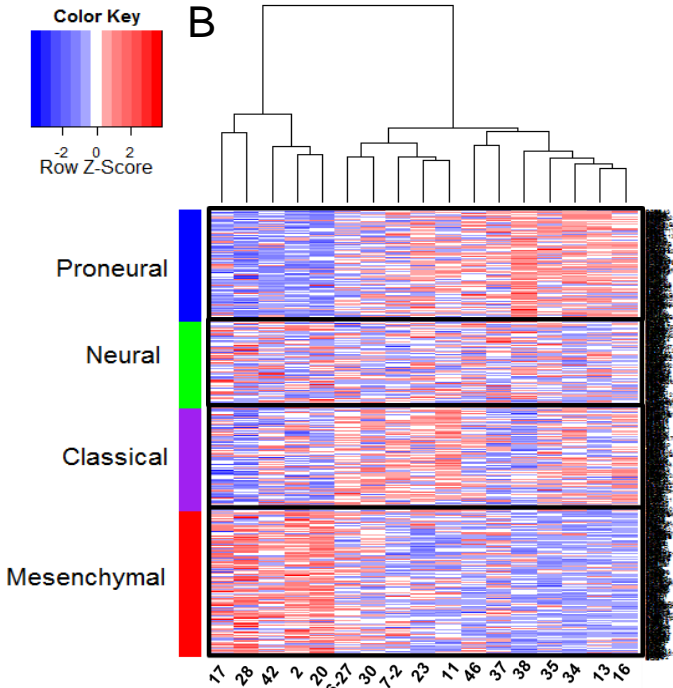

| EGFR      |                       |           |
|-----------|-----------------------|-----------|
| Sample ID | GSC (DNA copy number) | GBM (IHC) |
| 13        | normal                | -         |
| 11        | amp (~4 copies)       | +++       |
| 17        | normal                | -         |
| 34        | amp (~14 copies)      | +++       |
| 2         | amp (~6 copies)       | +++       |
| 16        | normal                | -         |
| 7-11      | normal                | -         |
| 7-2       | normal                | -         |
| 30        | amp (~4 copies)       | +++       |
| 6-27      | normal                | +++       |
| 38        | normal                | -         |
| 20        | amp (~4 copies)       | ND        |
| 28        | normal                | -         |
| 267       | normal                | -         |

"-" no detectable level  
 "+++" high expression  
 "ND" not determined

D

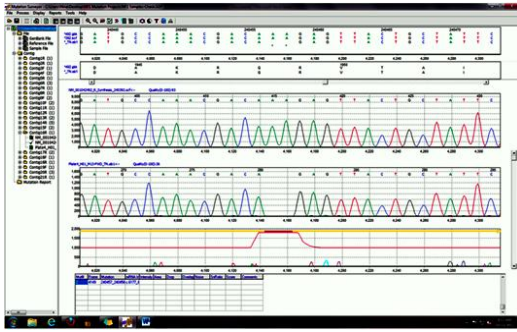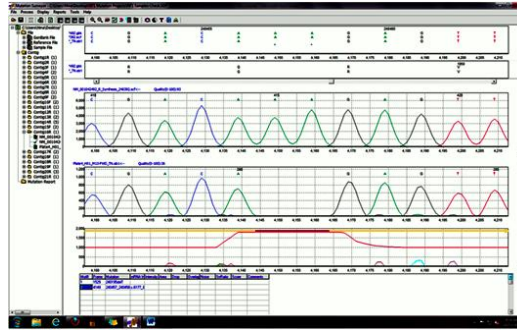

GSC 6-27, EX 39:  
Homozygous 2bp deletion of  
AA (240457\_240458)

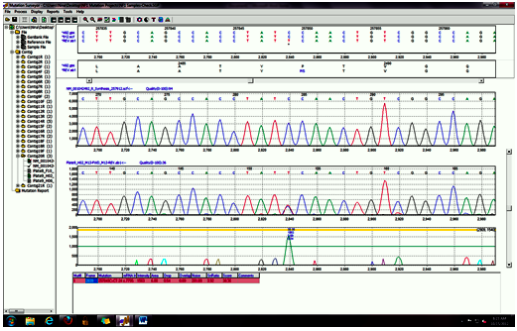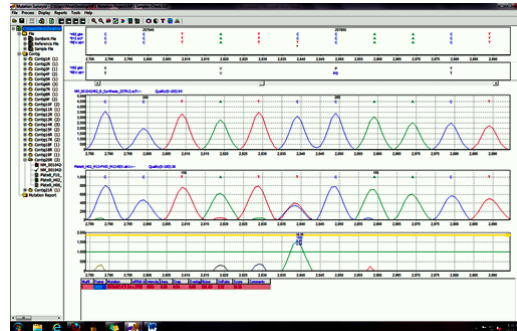

GSC 28, EX 50:  
(257849C>CT : 2488P>P/S)

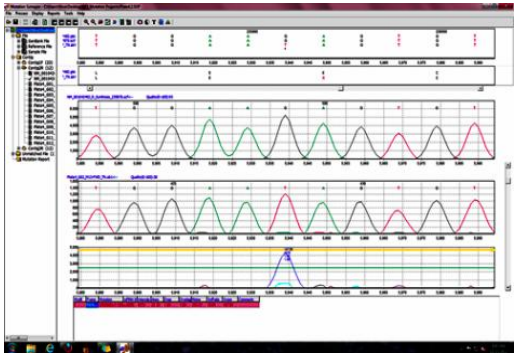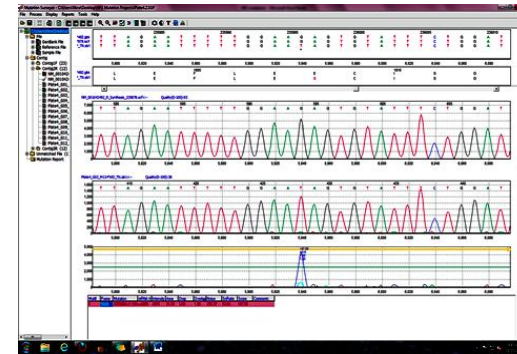

GSC 28, EX 38  
(235996G>T : 1908E>X)

□ PN GSC  
■ MES GSC

E

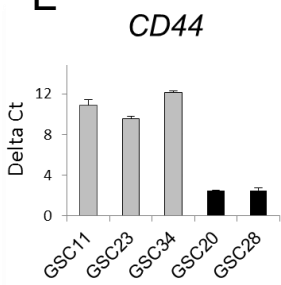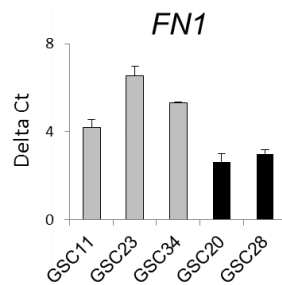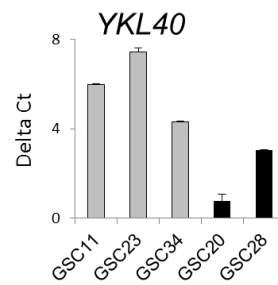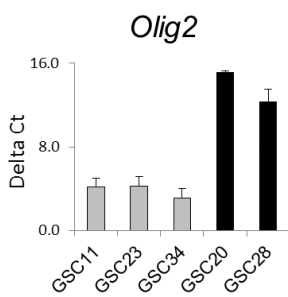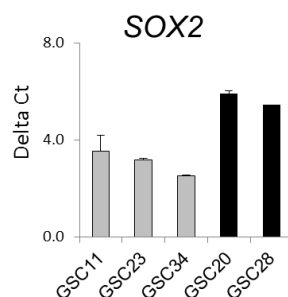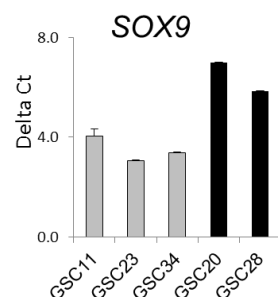

F

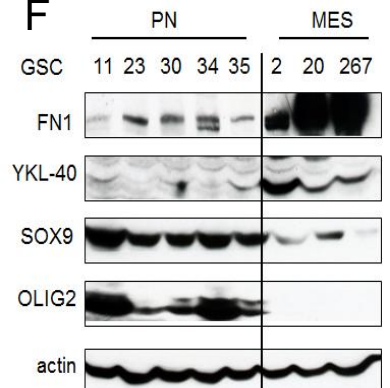

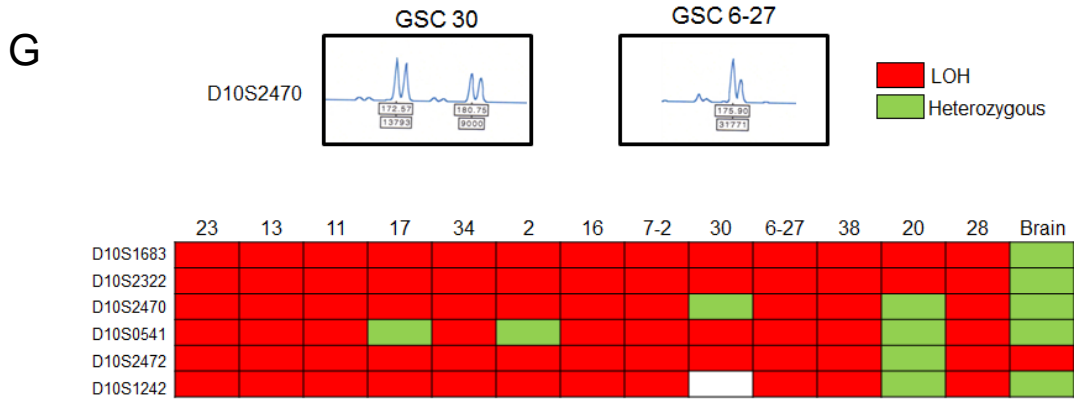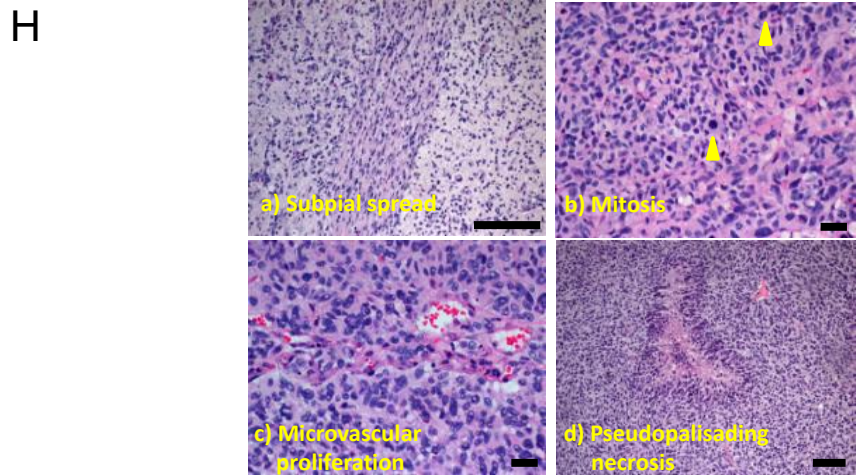

**Figure S1, related to Figure 1.**

(A) GSEA of genes specifically enriched either in cluster 1 or 2. A ranked gene list of cluster genes on HGU133a version 2 microarray chip was compared against PN, MES, NL, CL or PROL gene lists defined previously (Phillips et al., 2006; Verhaak et al., 2010).

(B) Supervised hierarchical clustering of GSCs according to previously defined PN, MES, CL, or Neural (NL) subtypes (Verhaak et al., 2010).

(C) IHC staining of EGFR in GBMs is shown. Intense membrane staining is seen in tumors that have amplification versus those that do not. Scale bar: 100  $\mu$ m. Bottom table shows the EGFR copy number as detected by Taqman assay. The MES GSCs are shown in red font.

(D) Sanger sequence trace showing 2 bp deletion in exon 39 of GSC 6-27 and homozygous mutations in exon 50 and exon 38 of GSC28.

(E) qRT-PCR analysis of *OLIG2*, *SOX2*, *SOX9*, *FN1*, *CD44* and *YKL40* in MES (GSC 20 and 28) and PN (GSC 11, 23 and 34) GSCs. Bar graph shows average delta Ct against *RPS27* used as a control. Note that higher delta Ct value implies lower overall gene expression. Error bar indicates +/- SD.

(F) Western blot analysis of OLIG2, SOX9, FN1, YKL-40 and actin expression in PN (11, 23, 30, 34, 35) and MES (2, 20, 267) GSCs.

(G) Representative traces of genescan for chromosome 10 are shown on top. The heatmap below shows if a call was made as LOH (red) or heterozygous (green) based on the traces.

(H) Representative hematoxylin and eosin staining of xenograft tumors derived from GSCs. Hematoxylin and eosin stains showing pathological features characteristic of GBM. (a) sub-pial spread, (b) mitotic figures (arrows), (c) microvascular proliferation, and (d) pseudopalisading necrosis. Scale bars: a & d, 100  $\mu\text{m}$ ; b & c, 20  $\mu\text{m}$ .



**Table S1 related to Figure 1. Characteristics of GBMs used to isolate GSCs**

| GSC  | Tumor type      | Clinical Status         | Neurospheres (+/-) |
|------|-----------------|-------------------------|--------------------|
| 2    | GBM             | primary                 | +                  |
| 2-14 | GBM             | primary                 | +                  |
| 3    | GBM             | primary                 | -                  |
| 6-27 | GBM             | primary                 | +                  |
| 7-2  | GBM             | primary (prior surgery) | +                  |
| 7-6  | GBM             | primary                 | +                  |
| 7-11 | GBM             | primary                 | +                  |
| 11   | GBM             | recurrent               | +                  |
| 13   | GBM             | primary                 | +                  |
| 14   | GBM             | primary                 | -                  |
| 16   | GBM             | recurrent               | +                  |
| 17   | GBM             | recurrent               | +                  |
| 20   | GBM/gliosarcoma | primary                 | +                  |
| 21   | GBM             | primary                 | -                  |
| 22   | GBM             | primary                 | -                  |
| 23   | GBM             | recurrent               | +                  |
| 28   | GBM/gliosarcoma | recurrent               | +                  |
| 30   | GBM             | primary                 | +                  |
| 33   | GBM             | primary                 | -                  |
| 34   | GBM             | recurrent               | +                  |
| 35   | GBM             | primary                 | +                  |
| 36   | GBM             | primary                 | -                  |
| 37   | GBM             | primary                 | +                  |
| 38   | GBM             | primary                 | +                  |
| 41   | GBM             | primary                 | -                  |
| 42   | GBM             | primary                 | +                  |
| 46   | GBM             | primary                 | -                  |
| 48   | GBM             | primary                 | +                  |
| 240  | GBM             | primary (prior surgery) | +                  |
| 248  | GBM             | primary                 | +                  |
| 262  | GBM             | primary                 | +                  |
| 264  | GBM             | primary (prior surgery) | +                  |
| 267  | GBM             | recurrent               | +                  |
| 274  | GBM             | recurrent               | +                  |
| 275  | GBM             | recurrent               | +                  |
| 280  | GBM             | primary                 | +                  |
| 282  | GBM             | recurrent               | +                  |
| 283  | GBM             | primary                 | +                  |
| 295  | GBM             | recurrent               | +                  |
| 296  | GBM             | primary                 | +                  |
| 300  | GBM             | primary                 | +                  |

The neurosphere forming ability of various human GBM tumors is shown. “+” indicates ability to form secondary neurospheres and subsequent propagation, and a “-” indicates inability to form secondary neurospheres and expansion.

**Table S3 related to Figure 1.** List of genes used as PN or MES markers in GSCs

| Gene            | Expression                                                               | References                                                                                                                                                |
|-----------------|--------------------------------------------------------------------------|-----------------------------------------------------------------------------------------------------------------------------------------------------------|
| <i>YKL40</i>    | Chondrocytes, macrophages, fibroblasts, vascular smooth muscle cells etc | (Hakala et al., 1993)<br>(Lee et al., 2009)                                                                                                               |
| <i>CD44</i>     | Mesenchymal progenitor cells, reactive astrocytes, multiple cancers      | (Campagnoli et al., 2001; Ghilzon et al., 1999; Girgrah et al., 1991a; Girgrah et al., 1991b; Kuppner et al., 1992; Sun et al., 2003; Zohar et al., 1998) |
| <i>CTGF</i>     | Endothelial cells, fibrosis, fibroblasts                                 | (Haudenschild et al., 2001)<br>(Abreu et al., 2002; Leask, 2004; Nakanishi et al., 2000)                                                                  |
| <i>TIMP1</i>    | Liver fibrosis, multiple sclerosis, breast carcinoma                     | (Bommarito et al., 2011; Kuvaja et al., 2012; Mayrand et al., 2012; Ostanin et al., 2011)                                                                 |
| <i>TGFBI</i>    | Cartilage, chondrocytes                                                  | (Hashimoto et al., 1997; Ohno et al., 2012)                                                                                                               |
| <i>SERPINE1</i> | Renal fibrosis, liver fibrosis                                           | (Bergheim et al., 2006; Narumoto et al., 2012; Samarakoon et al., 2012; Sun et al., 2003)                                                                 |
| <i>FN1</i>      | Fibroblasts, mesoderm, vasculature                                       | (Mao and Schwarzbauer, 2005; Mosher, 1984; Stenman and Vaheri, 1978)                                                                                      |
| <i>OLIG2</i>    | Mature oligodendrocytes,<br>Oligodendrocyte precursors (OPCs)            | (Lu et al., 2002; Lu et al., 2000; Takebayashi et al., 2002; Zhou                                                                                         |
| <i>CD15</i>     | Neural stem cells, Glioma stem cells, Medulloblastoma stem like cells    | (Capela and Temple, 2002; Hennen et al., 2011; Pruszek et al., 2009; Read et al., 2009; Son et al., 2009; Yuan et al., 2011)                              |
| <i>SOX9</i>     | Neural stem cells, neural crest                                          | (Cheng et al., 2009; Cheung and Briscoe., 2003; Kang et al., 2012; Scott et al., 2010; Stolt et al., 2003; Stolt et al., 2002; Wegner and Stolt, 2005)    |
| <i>SOX2</i>     | Neural stem cells, ES cells                                              | (D'Amour and Gage, 2003; Favaro et al., 2009; Taranova et al., 2006)                                                                                      |
| <i>NCAM1</i>    | Neural tube, Neural progenitor cells                                     | (Bally-Cuif et al., 1993; Mayer-Proschel et al., 1997; Pennartz et al., 2004; Thiery et al., 1982)                                                        |
| <i>ASCL1</i>    | oligodendrocyte precursor cells (OPCs), Neural progenitor cells          | (Caiazzo et al., 2011; Parras et al., 2007; Ross et al., 2003; Ueno et al., 2012)                                                                         |
| <i>DLL3</i>     | Developing nervous system, neural progenitor cells                       | (Casarosa et al., 1999; Kusumi et al., 2001; Kusumi et al., 2004; Yoon and Gaiano, 2005; Zhao et al., 2009)                                               |

Genes highlighted in red represent MES whereas genes highlighted in green represent PN markers. The expression of these markers in normal tissues is indicated and referenced.

**Table S4 related to Figure 1. Tumor forming capacity of GSCs**

| GSC  | No. of cells implanted | Tumorigenic | No. of mice                   | Median Survival                                         |
|------|------------------------|-------------|-------------------------------|---------------------------------------------------------|
| 2    | 500,000                | yes         | 5/5                           | ~ 60 days (NOD-SCID)/ ~120 days (Foxn1 <sup>nu</sup> )  |
| 2-14 | 500,000                | no          | 0/5                           |                                                         |
| 6-27 | 500,000                | yes         | 5/5                           | ~90 days                                                |
| 6-27 | 100,000                | yes         | 5/5                           | ~90 days                                                |
| 7-2  | 500,000                | yes         | 5/5                           | ~60 days                                                |
| 7-2  | 100,000                | yes         | 5/5                           | ~60 days                                                |
| 7-2  | 10,000                 | yes         | 5/5                           | ~90 days                                                |
| 7-6  | 500,000                | no          | 0/5                           |                                                         |
| 7-10 | 500,000                | yes         | 5/5 (2/5 extracranial tumors) | ~70 days (Foxn1 <sup>nu</sup> )                         |
| 7-11 | 500,000                | yes         | 5/5                           | 35 days (Foxn1 <sup>nu</sup> )                          |
| 11   | 500,000                | yes         | 5/5                           | ~ 45 days (NOD-SCID / Foxn1 <sup>nu</sup> )             |
| 11   | 100,000                | yes         | 8/8                           | ~60 days (Foxn1 <sup>nu</sup> )                         |
| 13   | 500,000                | yes         | 5/5                           | ~ 90 days                                               |
| 16   | 500,000                | no          | 0/5                           |                                                         |
| 17   | 500,000                | yes         | 5/5                           | ~ 20 days                                               |
| 20   | 500,000                | yes         | 5/5                           | ~ 90 days (NOD-SCID) / ~120 days (Foxn1 <sup>nu</sup> ) |
| 23   | 500,000                | yes         | 5/5                           | ~70 days (NOD-SCID /Foxn1 <sup>nu</sup> )               |
| 23   | 100,000                | yes         | 10/10                         | ~ 110 days (Foxn1 <sup>nu</sup> )                       |
| 23   | 10,000                 | yes         | 10/10                         | ~ 175 days (Foxn1 <sup>nu</sup> )                       |
| 25   | 500,000                | no          | 0/5                           |                                                         |
| 28   | 500,000                | yes         | 5/5                           | ~ 90 days (NOD-SCID) / ~120 days (Foxn1 <sup>nu</sup> ) |
| 34   | 500,000                | yes         | 5/5 (extracranial tumors)     | ~ 120 days (Foxn1 <sup>nu</sup> )                       |
| 38   | 500,000                | yes         | 5/5                           | ~60 days (Foxn1 <sup>nu</sup> )                         |

Table shows the number of cells implanted in each GSC, the number of mice forming tumors and the median survival of these animals. Note that in some cases both NOD-SCID as well as Foxn1<sup>nu</sup> mice were implanted with GSCs.

**Table S5 related to Figure 1. Pathological features of GSC derived tumors**

| GSC                                                              | PN/MES | Invasion | MVP | PPN |
|------------------------------------------------------------------|--------|----------|-----|-----|
| 7-2                                                              | PN     | +        | +   | -   |
| 11                                                               | PN     | +/-      | +/- | +   |
| 13                                                               | PN     | +        | -   | +/- |
| 23                                                               | PN     | +        | +/- | -   |
| 38                                                               | PN     | +        | -   | -   |
| 17                                                               | MES    | -        | -   | +   |
| 2                                                                | MES    | +        | +/- | -   |
| 20                                                               | MES    | +        | +   | +   |
| +/- indicates a subset of the tumors did not show these features |        |          |     |     |
| MVP = microvascular proliferation                                |        |          |     |     |
| PPN = pseudopalisading necrosis                                  |        |          |     |     |



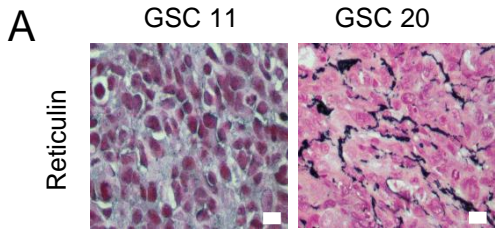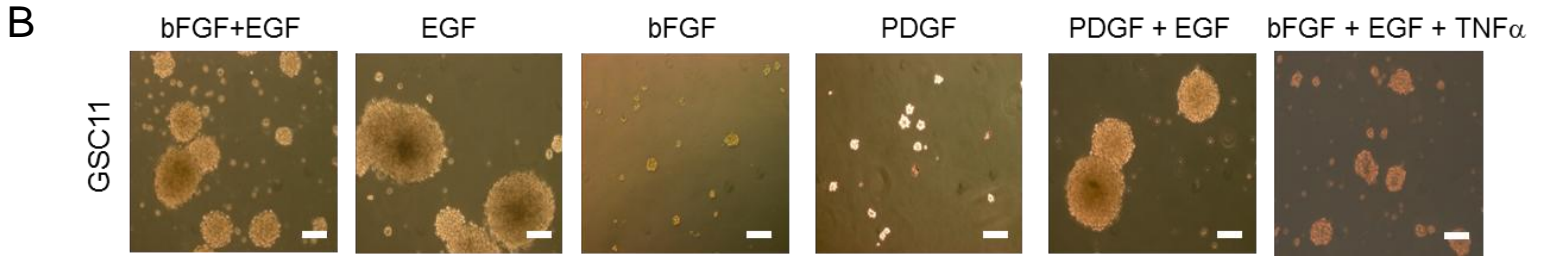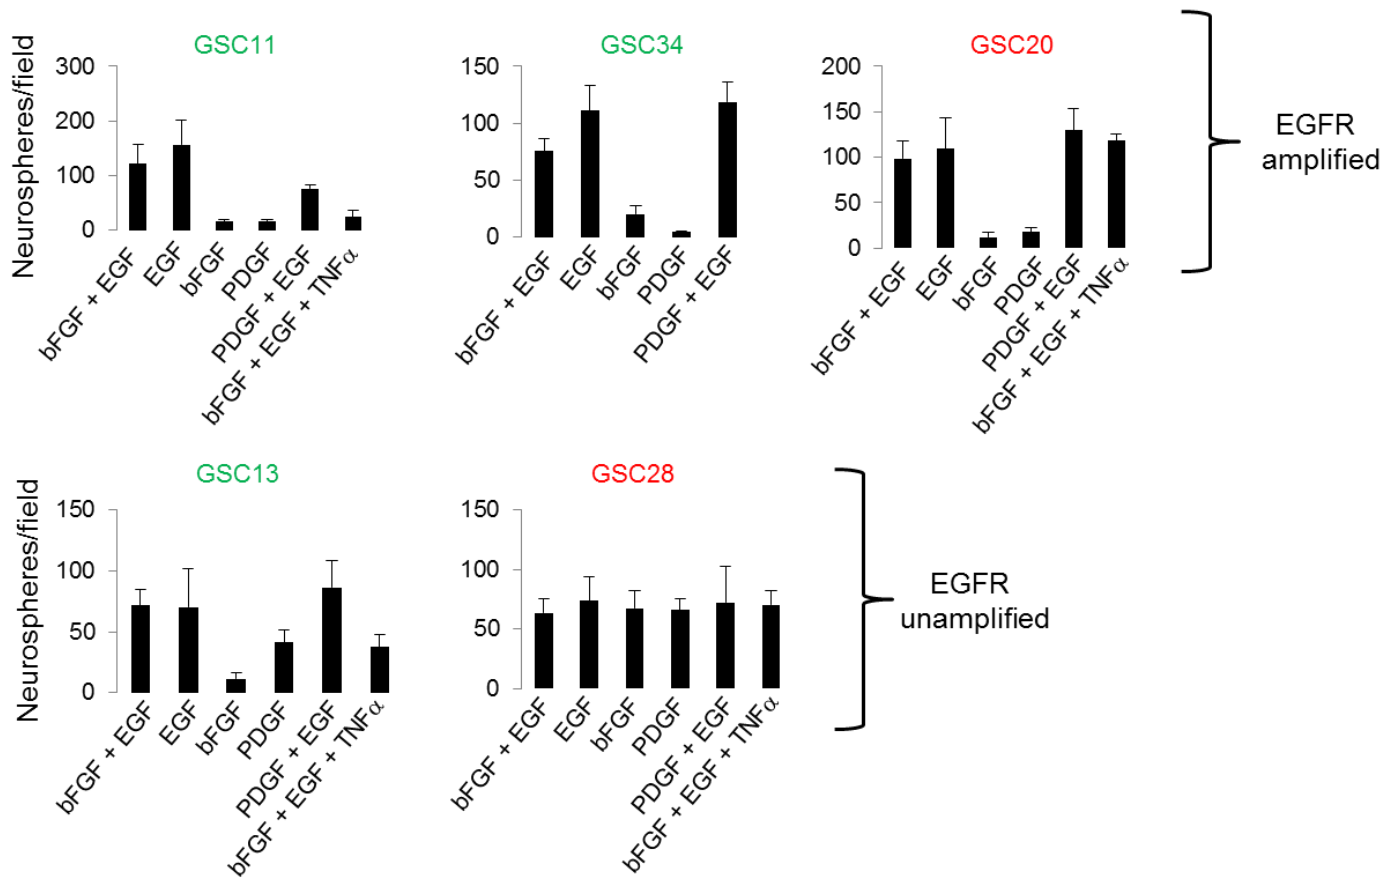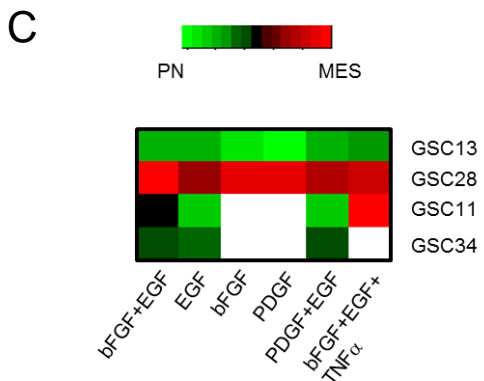

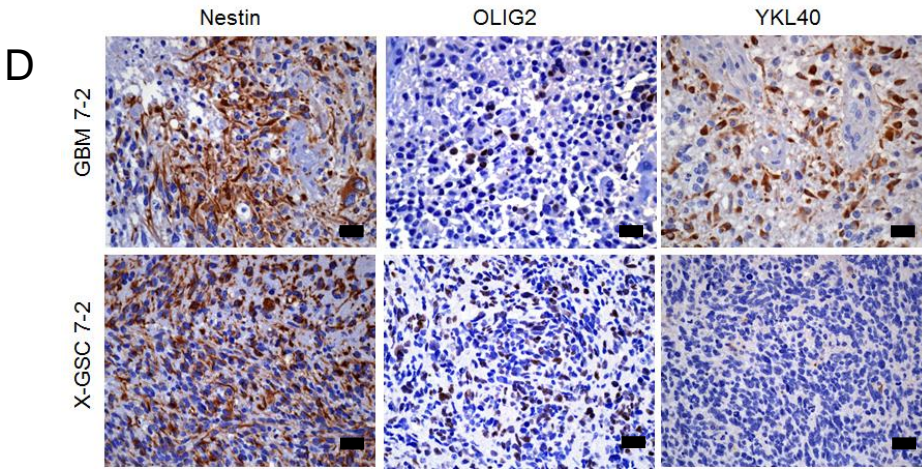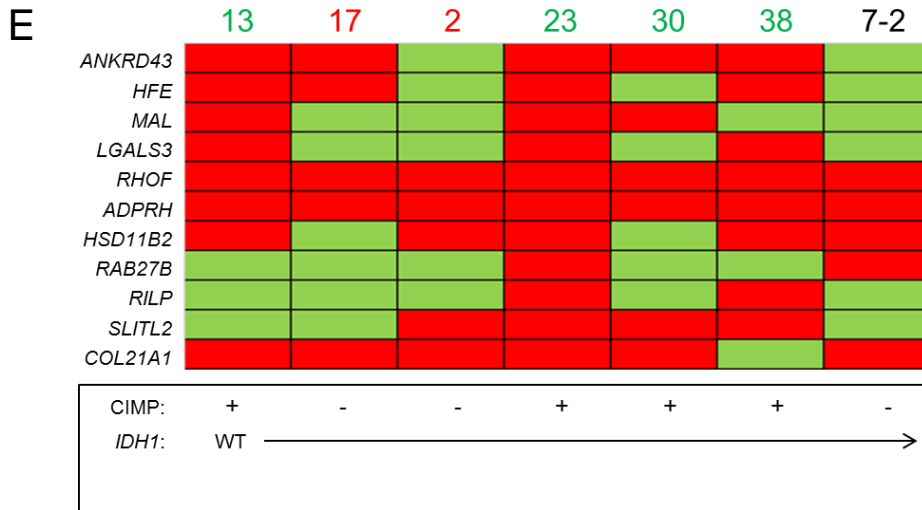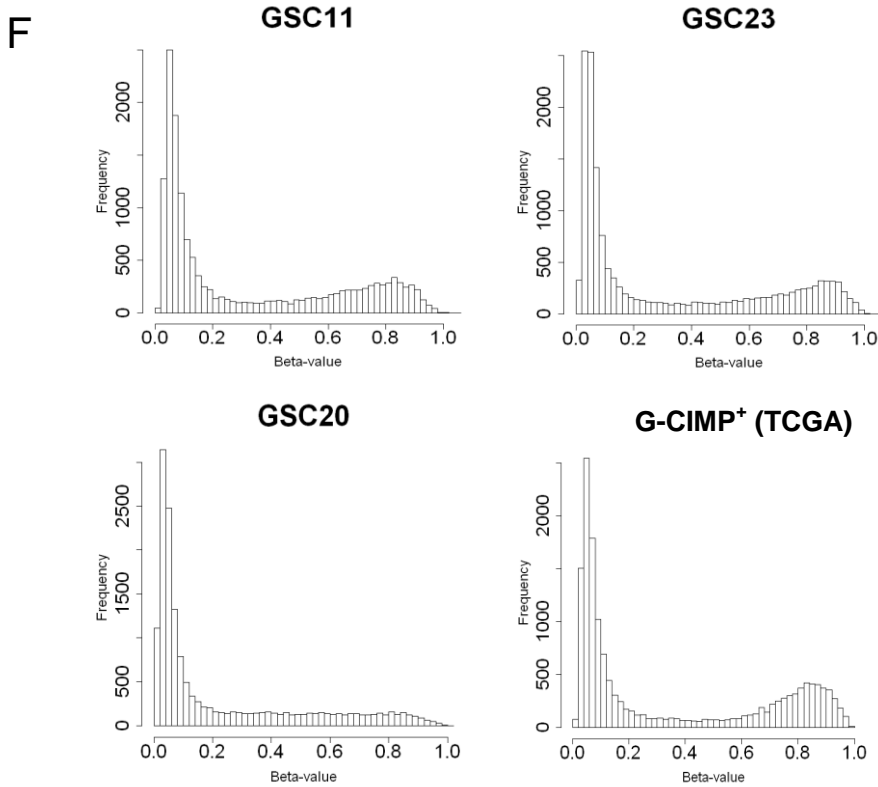

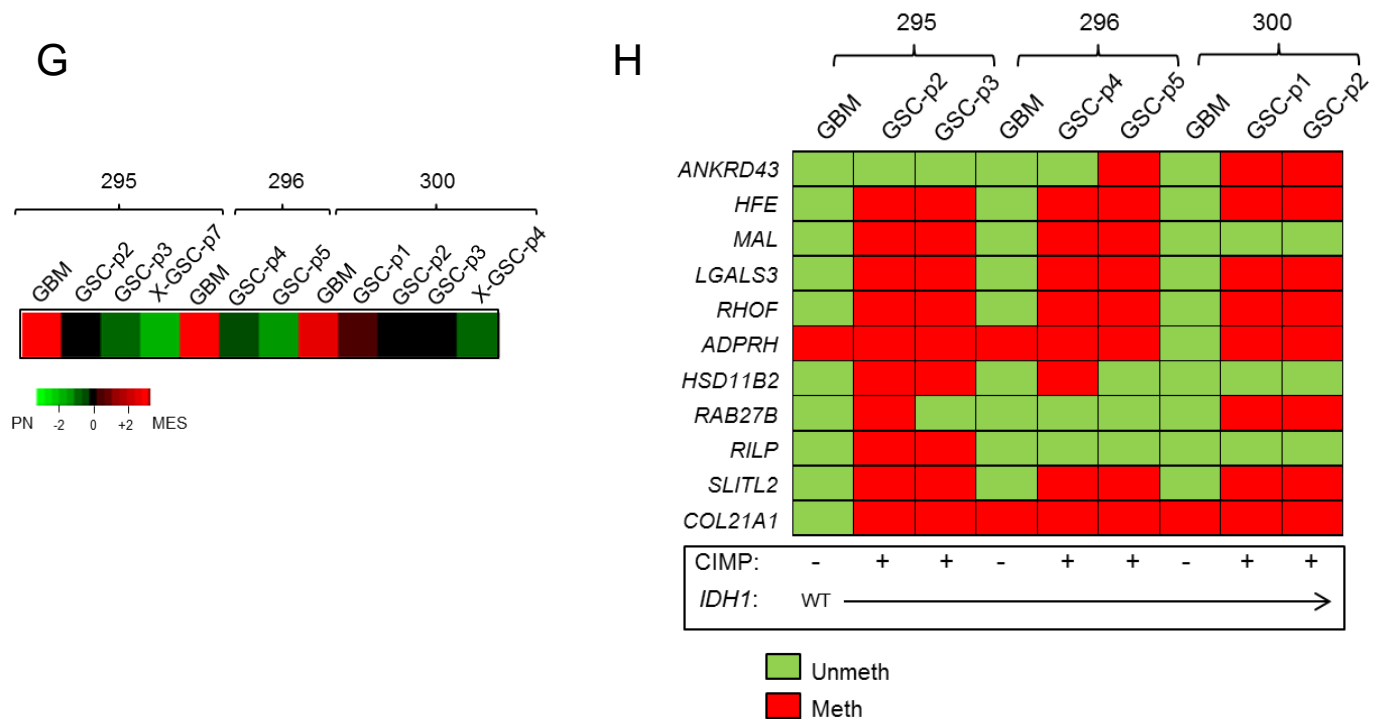

**Figure S2, related to Figure 2.**

(A) Reticulin staining of GSC11 and GSC20 -derived xenograft tumors. Scale bar: 20  $\mu$ m.

(B) Images of GSC11 neurospheres under various growth conditions are shown on top. Scale bar: 100  $\mu$ m. GSCs were cultured with differing combination of growth factors as indicated for three weeks. Bar graphs indicate mean values of number of neurospheres in three independent fields. Error bar indicates +/- SD. PN GSCs are shown with green font whereas MES GSCs are shown in red.

(C) The PN-MES metagene heatmap of GSCs cultured under varying growth factors.

(D) IHC analysis of Nestin, OLIG2 and YKL40 expression in patient matched GBM and xenografts of GSC7-2. Scale bar: 100 $\mu$ m.

(E) Methylight profiling of GSCs for G-CIMP status. Eleven markers were tested for presence of methylation on their promoters and coded as red if methylated and green if unmethylated. Samples were inferred as G-CIMP<sup>+</sup> if >50% of the loci showed methylation. The *IDH1* and PN/MES status of the same samples are indicated below.

(F) The histograms of GSC 11 and 23 indicate their relative global hypo/hypermethylation compared to GSC 20 and a sample G-CIMP<sup>+</sup> TCGA tumor. The bars indicate frequency of methylation after binning for  $\beta$ -values.

(G) Heatmap showing the predominant PN/MES gene expression signature of initiating GBM, and derived early passage GSCs.

(H) Methylight profiling of initiating GBM, and derived early passage GSCs. CIMP and *IDH1* status is shown below.

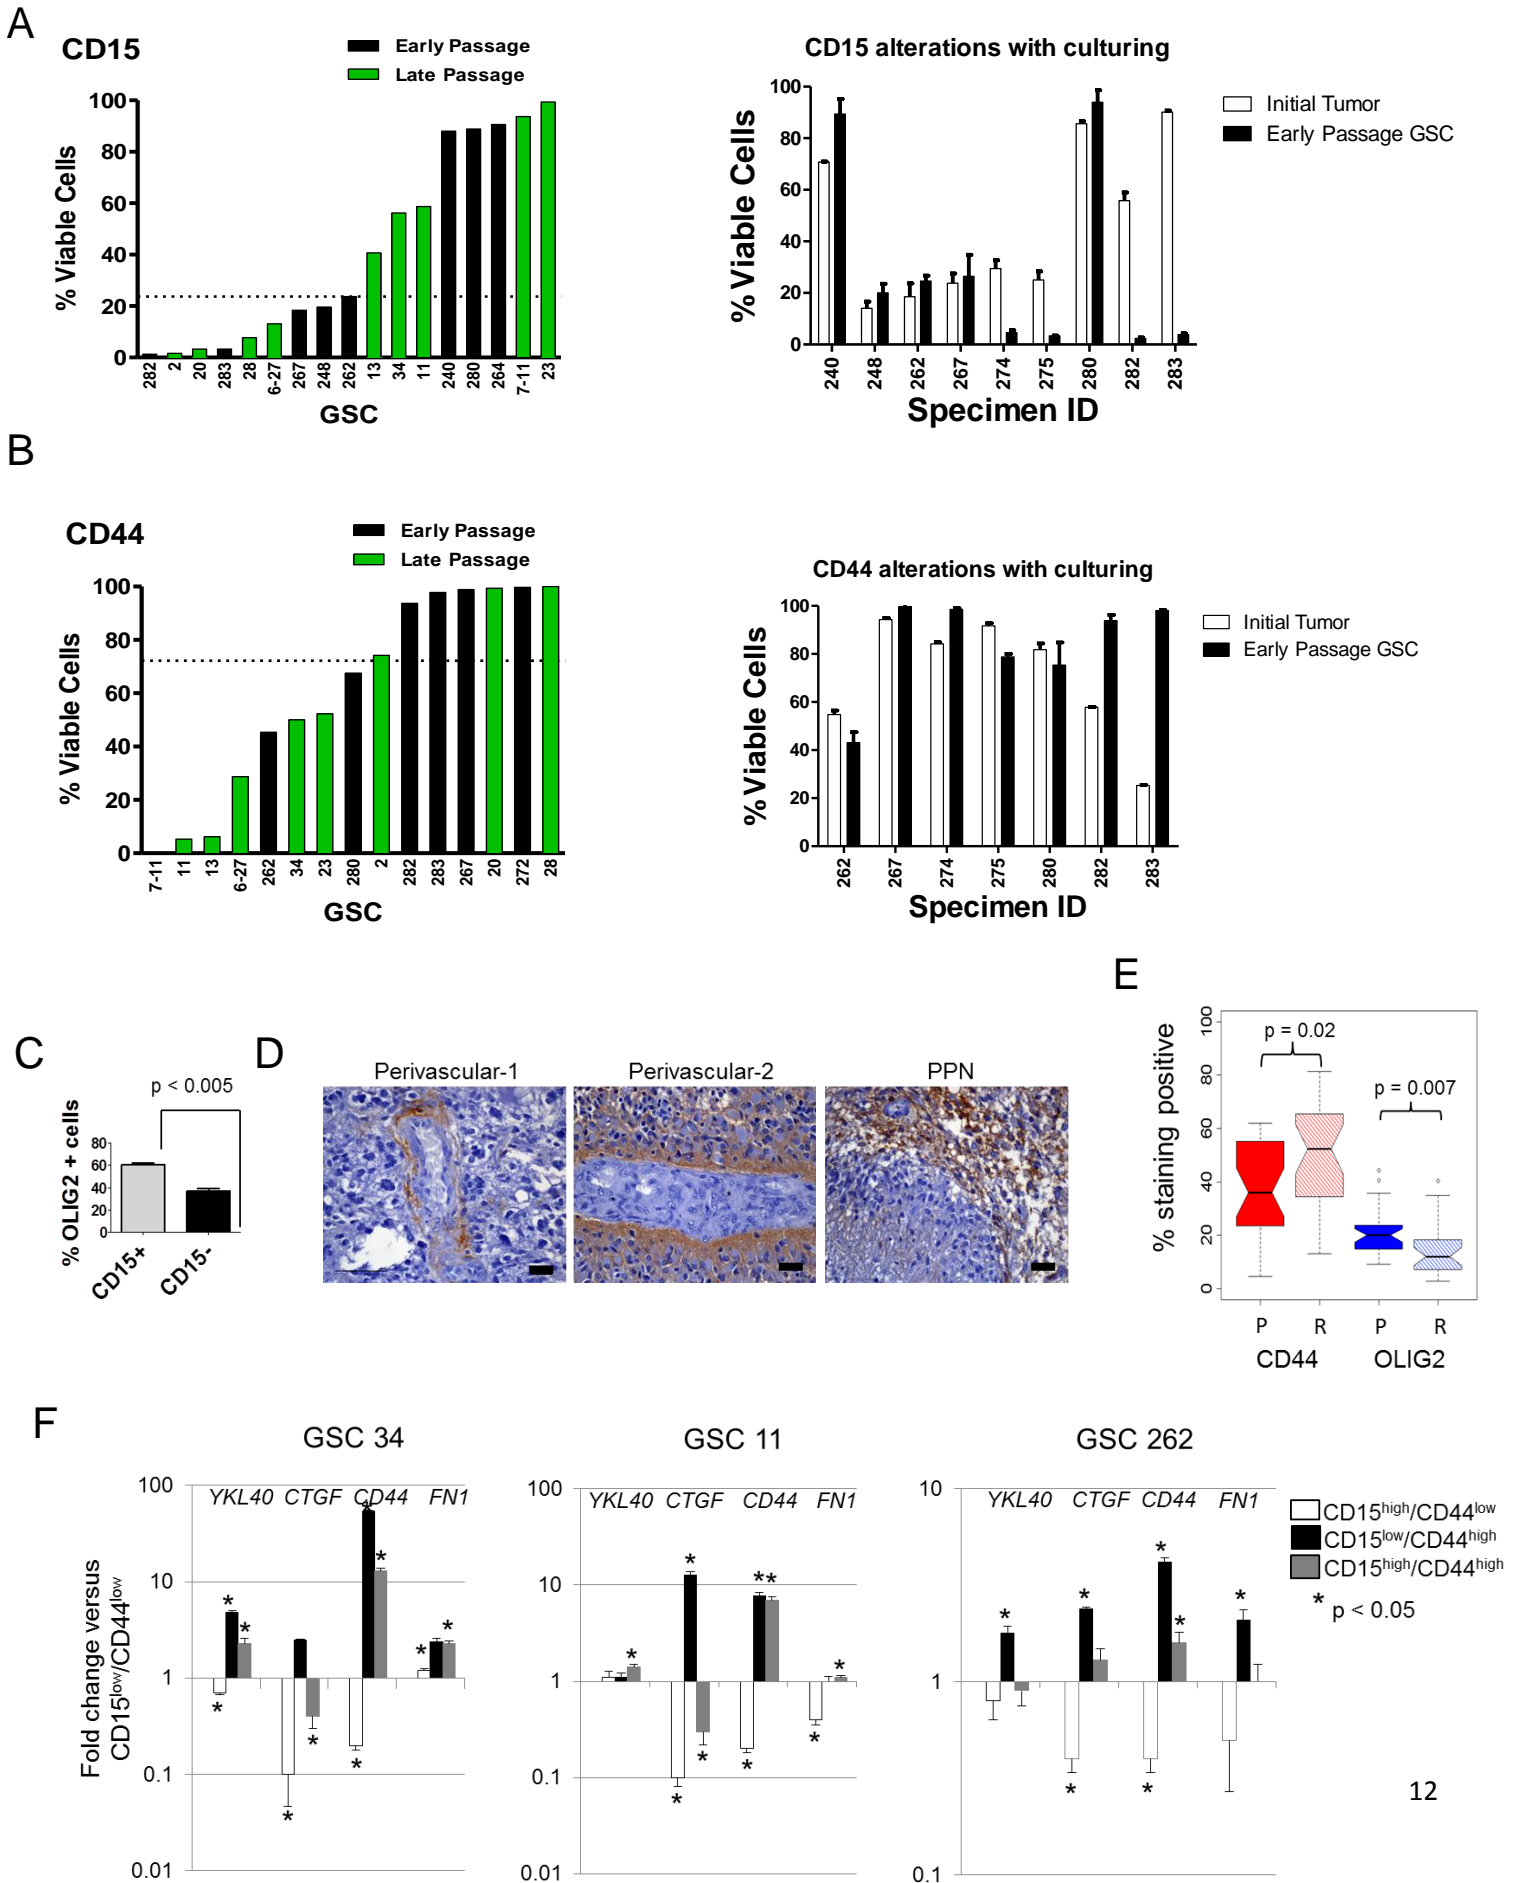



### Figure S3, related to Figure 3.

(A) Flow cytometry analysis of percentage of viable CD15 expression in early or late passage GSCs is shown on the left panel. Flow cytometric comparison of CD15 expression in the initial parental GBMs and the isolated early passage GSCs from the same tumor is shown on the right. Error bar indicates +/- SD.

(B) Flow cytometry analysis of percentage of viable CD44 expression in early or late passage GSCs is shown on the left panel. Flow cytometric comparison of CD44 expression in the initial parental GBMs and the isolated early passage GSCs from the same tumor is shown on the right. Error bar indicates +/- SD. Note that while early (<5) versus late (>20) passage of GSCs did not influence the proportion of CD15 or CD44, a subset of the GSCs (282 and 283) lost CD15 expression and gained CD44 in culture when compared to their parental tumors.

(C) Quantification of immunofluorescent analysis of CD15 sorted GSC34 cells plated onto laminin/poly-L-ornithine coated coverslips and stained for OLIG2. Bars represent average percentage expression of OLIG2 in ten random fields against DAPI stained nuclei. Error bar indicates +/- SEM.

(D) IHC staining of CD44 in multiple GBMs. Representative staining shows enrichment of CD44 staining on perivascular niche (left and middle panel) or regions surrounding pseudopalisading necrosis (PPN, right panel). Scale Bar: 20  $\mu$ m. Note that while CD44 was expressed throughout the tumor in the positive cases, enrichment around the perivascular niche as well as areas surrounding pseudo-palisading necrosis were frequently seen similar to other tumor initiating markers.

(E) Quantification of percentage of CD44 and OLIG2 positive cells in human primary (P) tumors and matched recurrent tumors (R) quantified in ten random fields (n = 30). Bar plots show the range of expression and outliers. p value was determined by Wilcoxon rank-sum test.

(F) Relative mRNA levels of MES genes determined by qRT-PCR of FACS sorted CD15 and CD44 subpopulation in GSCs. Bar graphs represent fold change of the transcript in various quadrants compared to CD15<sup>low</sup>/CD44<sup>low</sup> populations. Error bar represents +/- SD. *t* test was used to assess statistical significance.

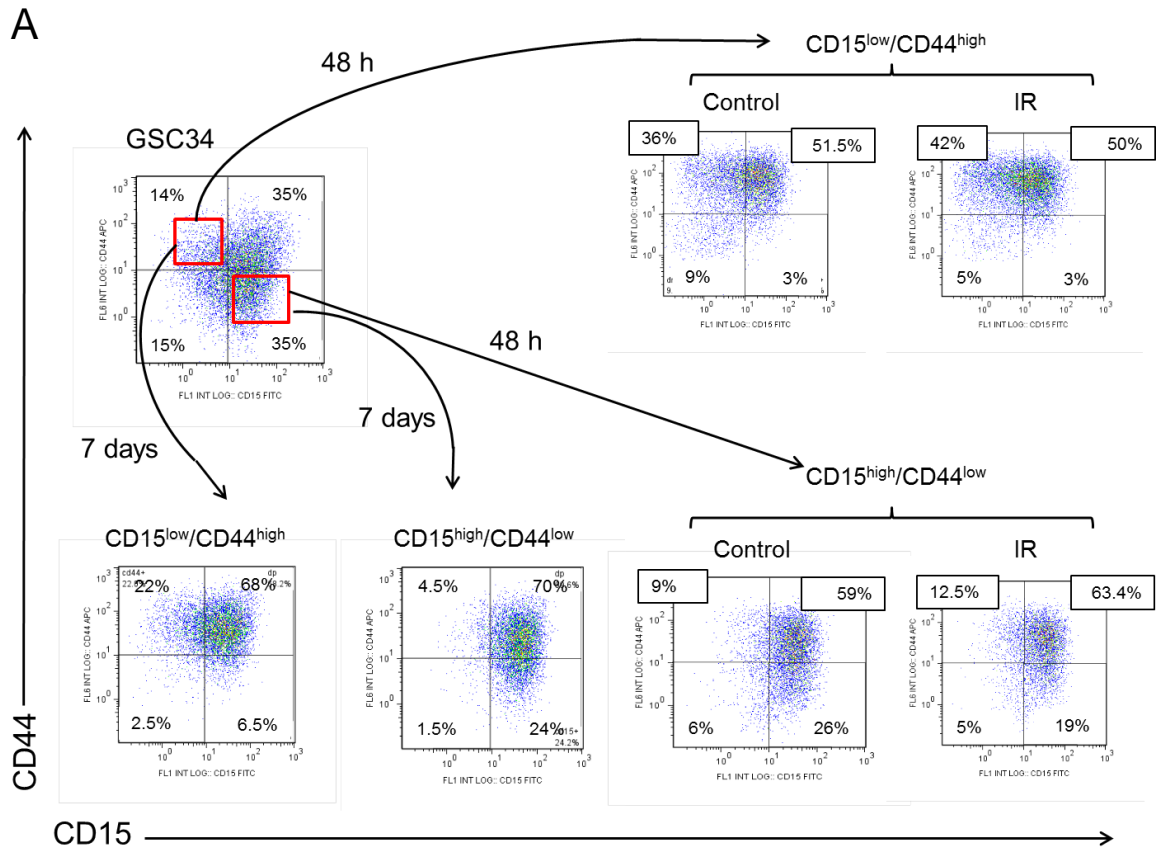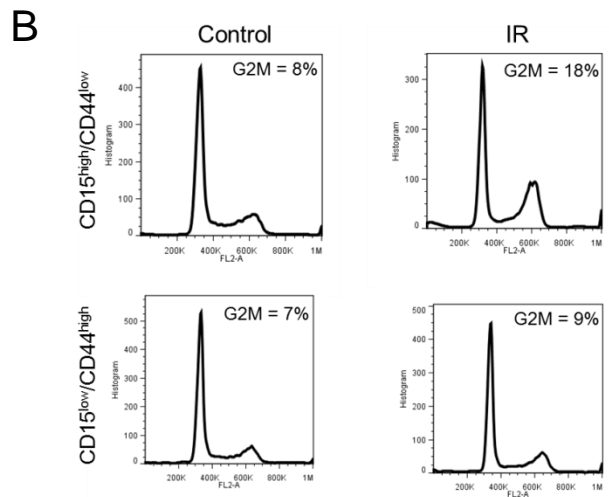

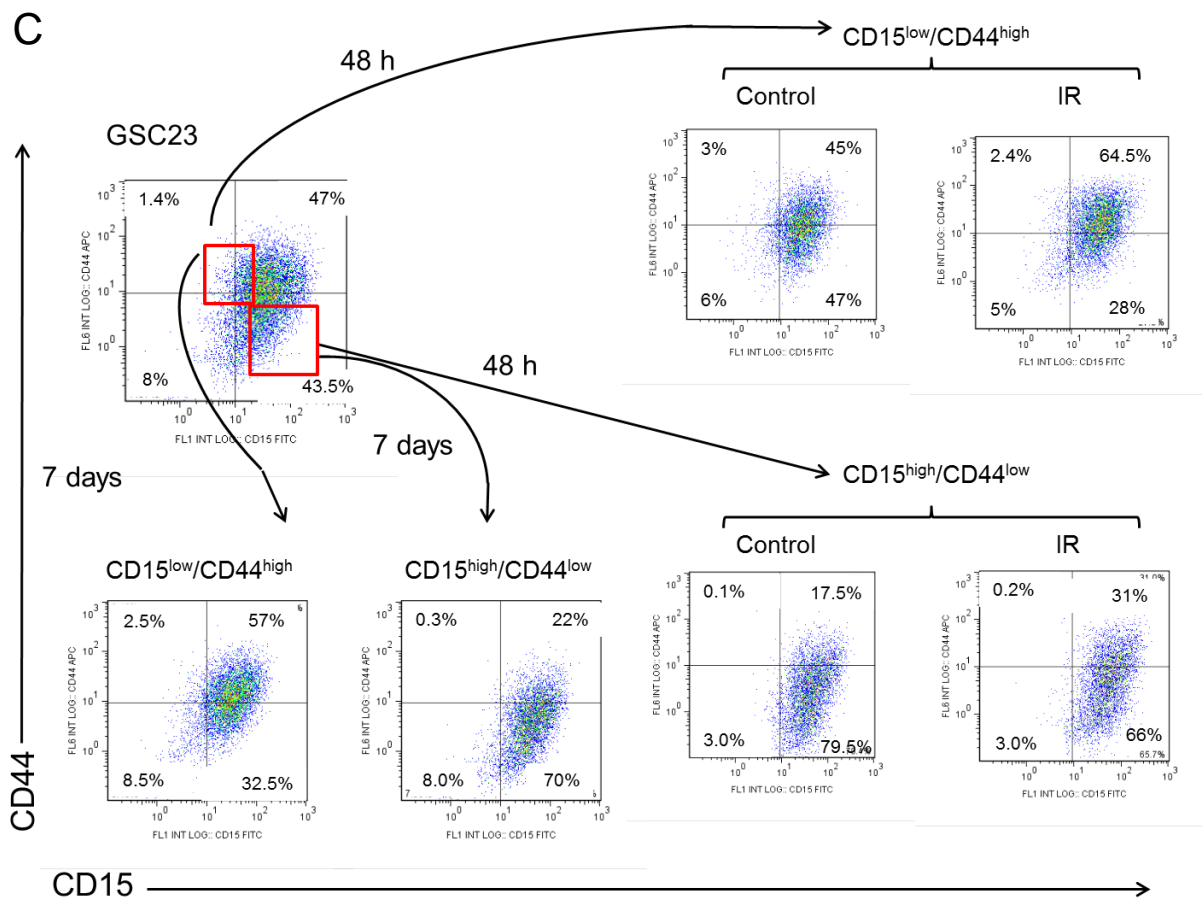

**Figure S4, related to Figure 4.**

(A) FACS analysis and sorting of CD15<sup>high</sup> and CD44<sup>high</sup> in GSC34 (shown in red boxes). Sorted populations were cultured for an additional 7 days to detect changes in the CD15<sup>high</sup> and CD44<sup>high</sup> population over time (lower panels). In parallel, 24h after sorting, cells were exposed to 6 Gy IR and analysed for percentage of CD15<sup>high</sup> and CD44<sup>high</sup> population for an additional 48 h (right panels). Percentage of cells in each quadrant is shown.

(B) Cell cycle analysis of CD15<sup>high</sup> and CD44<sup>high</sup> populations of GSC34 treated with 6 Gy IR. The percentage of cells in the G2/M phase is indicated within each cell cycle plot.

(C) FACS analysis and sorting of CD15<sup>high</sup> and CD44<sup>high</sup> in GSC23 (shown in red boxes) as described in S4A. For results shown in Figure 4, PN GSCs that expressed both CD15 and CD44 were sorted into CD15<sup>high</sup>/CD44<sup>low</sup> and CD15<sup>low</sup>/CD44<sup>high</sup> to see if the enrichment of populations with differential cell surface markers (that correlates with PN/MES states) from within single GSC cultures show differences in response to radiation. GSC34 had sufficient cells from both CD15<sup>high</sup> and CD44<sup>high</sup> groups and we tested for alteration in cell surface markers over time and in response to radiation. Despite originating from CD15<sup>high</sup> or CD44<sup>high</sup> subpopulation, 48h after sorting, populations became enriched for CD44 and CD15 expression

respectively. The general tendency was to accumulate double positive populations within a short period of time highlighting the inherent plasticity of expression of these cell surface markers. Treatment with radiation caused a mild increase in the CD44 population. At these time points, an increase in G2/M was restricted to the CD15<sup>high</sup> but not the CD44<sup>high</sup> subgroup implying the cells in a MES state (as marked by CD44<sup>high</sup> expression) were indeed radio-resistant. A similar response was seen with GSC23, where the accumulation of CD44<sup>high</sup> population in response to radiation was profound. Given the plasticity in these states long-term neurosphere assays and orthotopic studies in mice were not feasible.



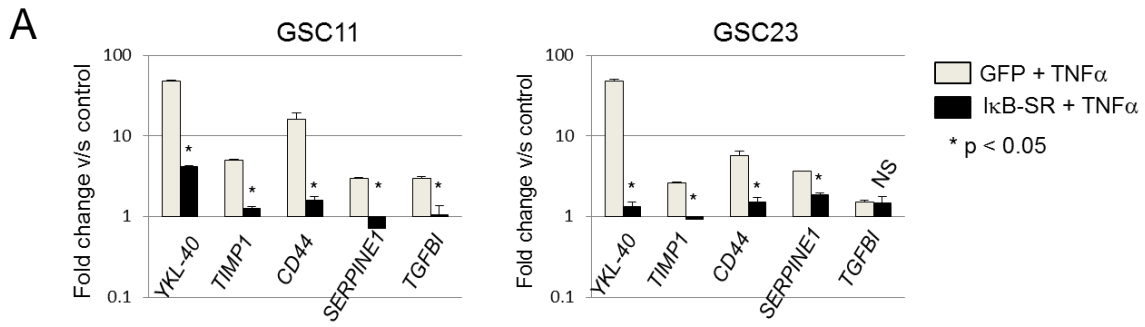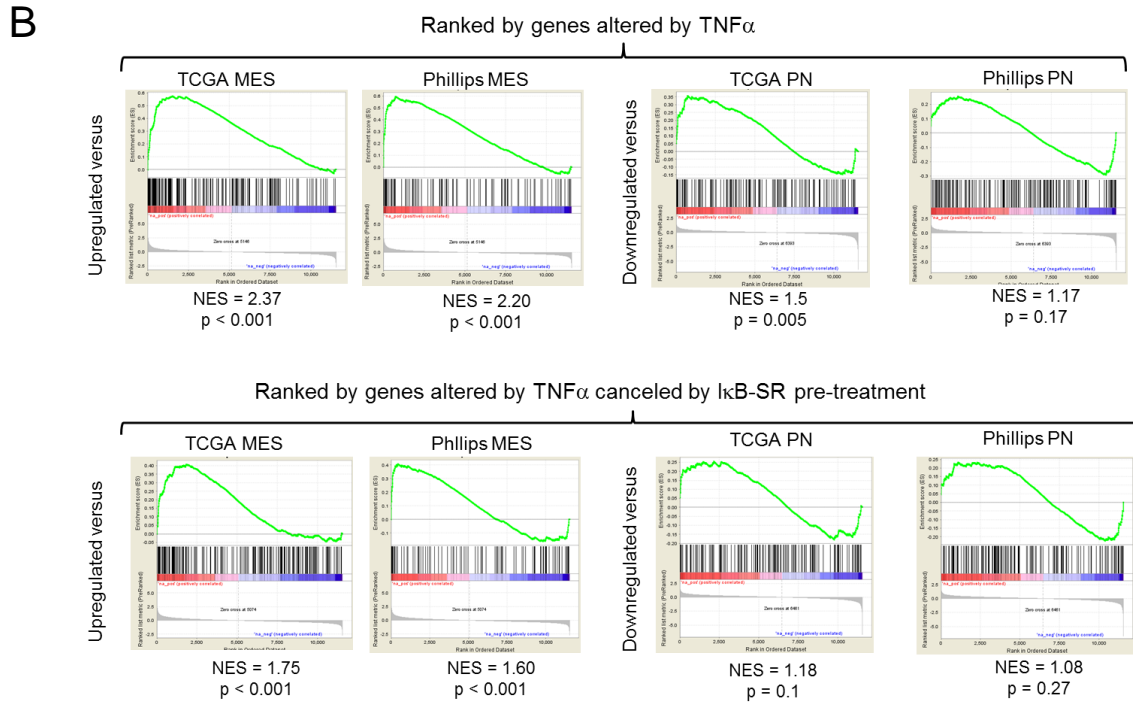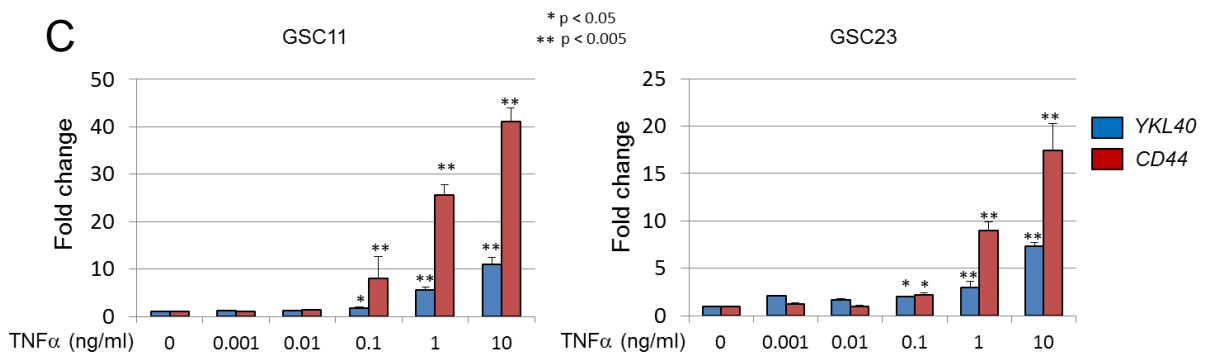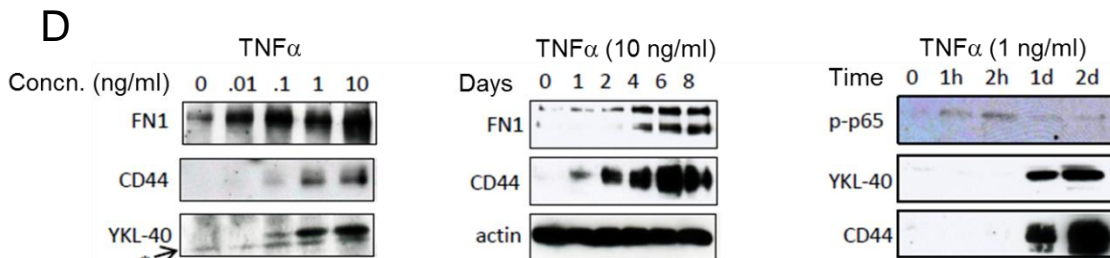

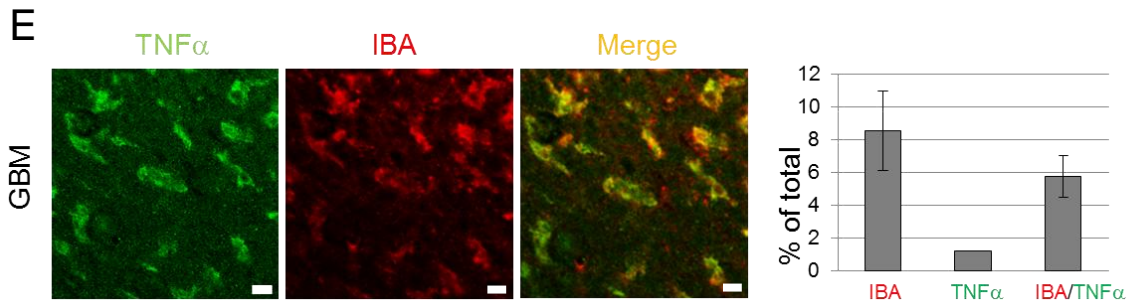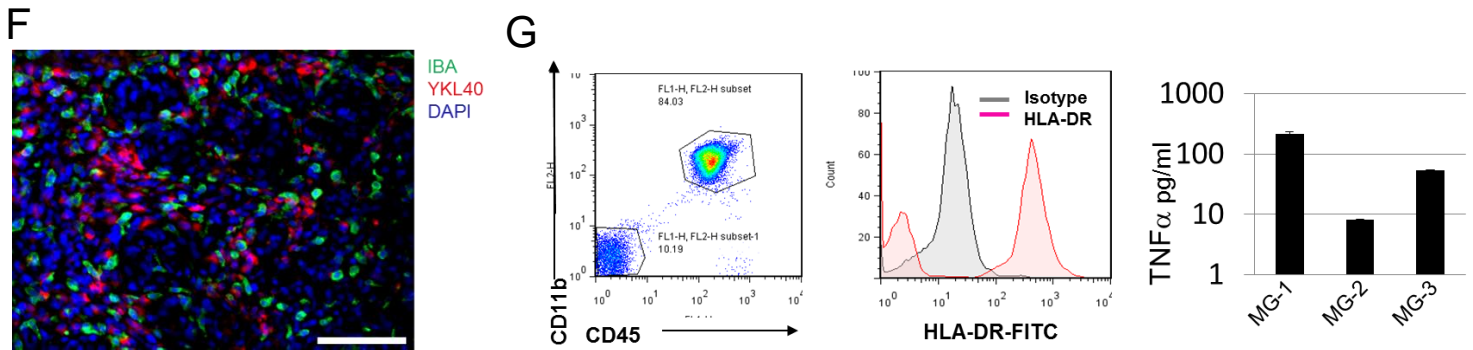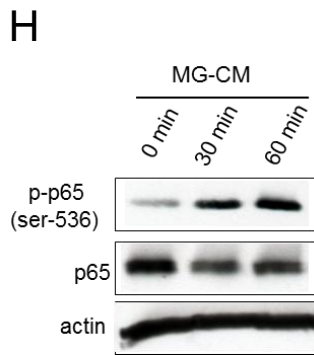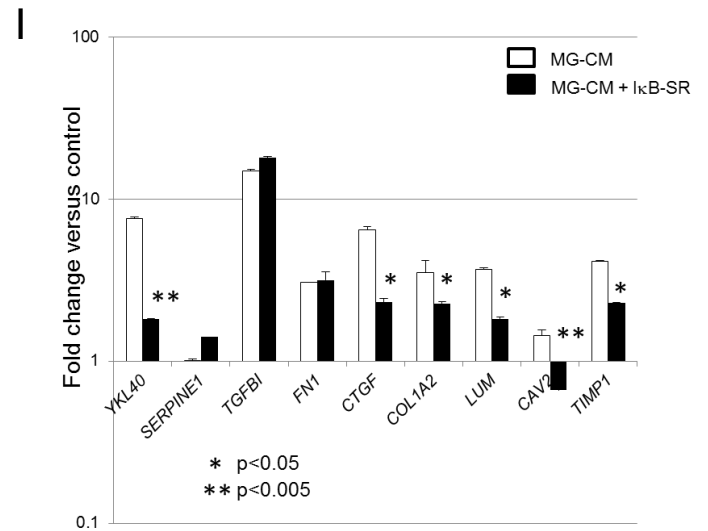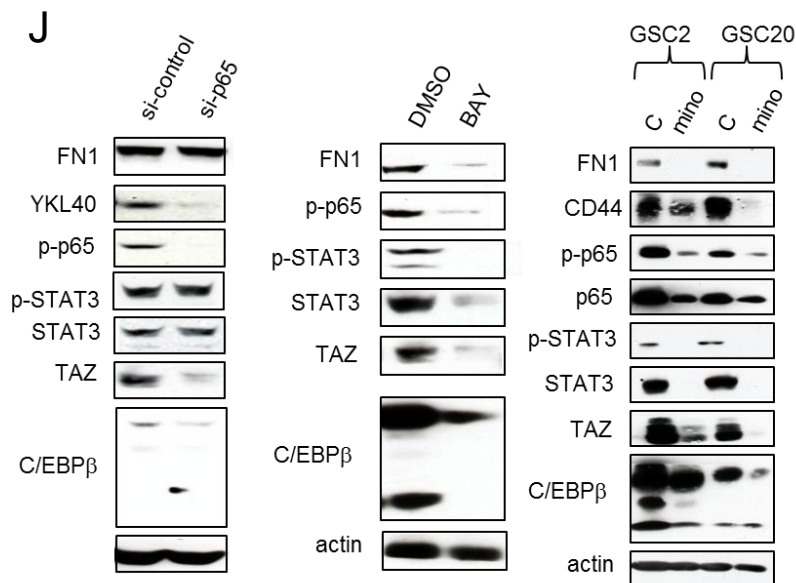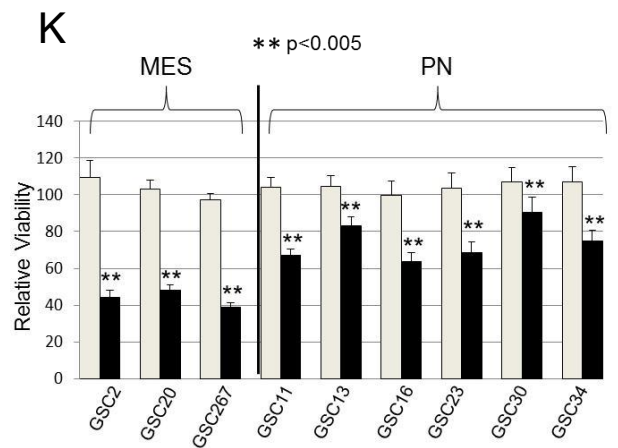

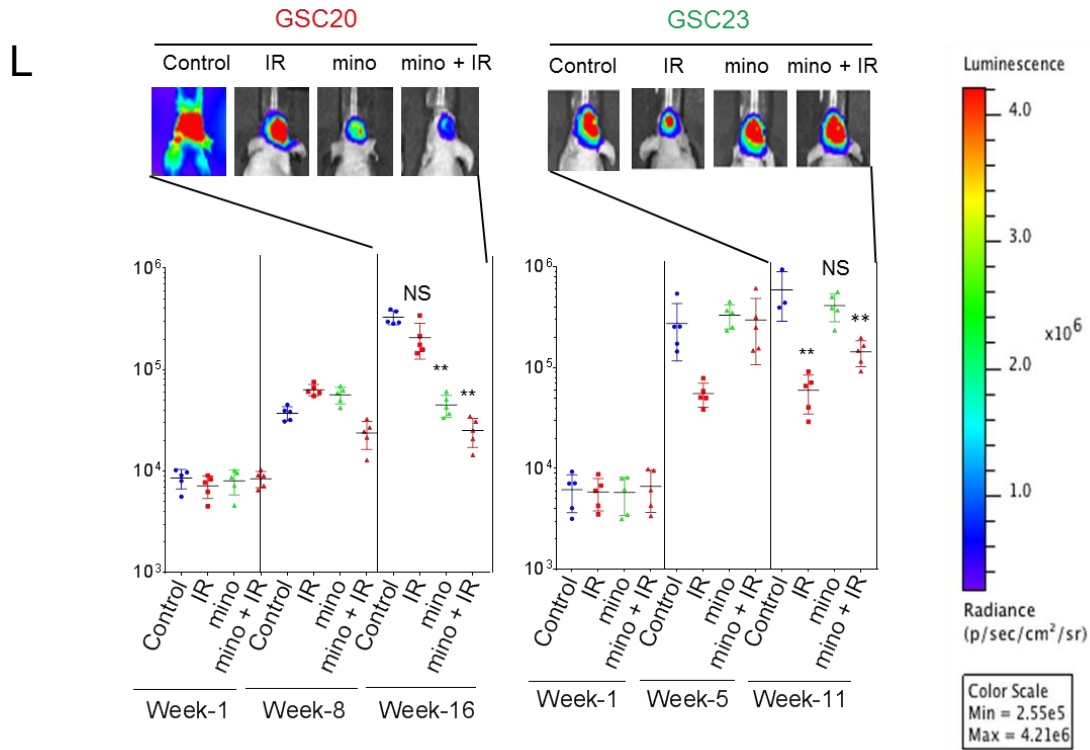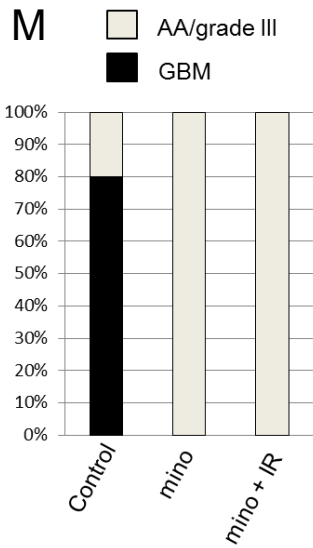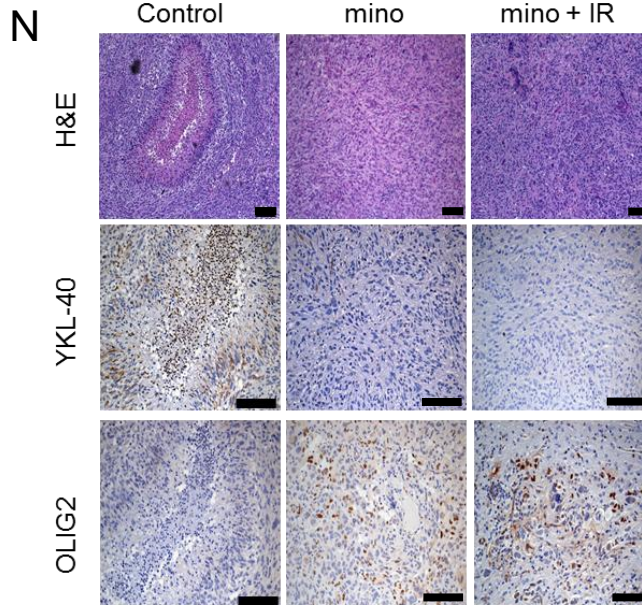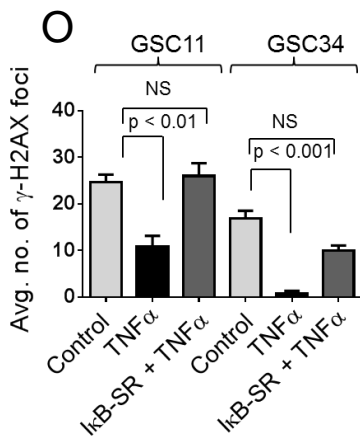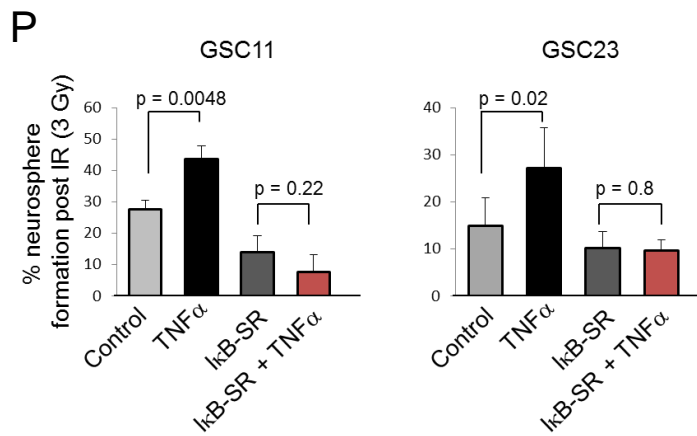

## Figure S5, related to Figure 5.

(A) qRT-PCR analysis of MES genes in GSC11 and GSC23 after treatment with TNF $\alpha$  (48 h, 10 ng/ml) with or without pre-treatment with I $\kappa$ B-SR or control GFP adenovirus 24 h prior to TNF $\alpha$  treatment. Bar graphs indicate average of triplicate measurements and plotted as fold change of TNF $\alpha$  treated versus untreated groups. Error bar indicates +/- SD. Statistical significance was assessed using *t* test.

(B) GSEA analysis of TNF $\alpha$  altered genes (1.5 fold or greater) (top) or TNF $\alpha$ -altered genes suppressed by I $\kappa$ B-SR pre-treatment (bottom). Comparison was made against Phillips or TCGA GBM MES and PN signatures.

(C) Upper panel shows the qRT-PCR analysis of dose response induction of *CD44* and *YKL40* in GSC11 (left) GSC23 (right) after 24h treatment with varying concentrations of TNF $\alpha$ . Bar graph shows relative expression of *CD44* and *YKL40* to cells without TNF $\alpha$  treatment. Error bar indicates +/- SD. *t* test was used to assess statistical significance.

(D) Western analysis of induction of FN1, CD44, YKL40 and p-p65 after TNF $\alpha$  treatment in GSC11. Left panel is the dose response induction of MES markers and the start indicates a non-specific band. The middle panel shows the time course and the right panel shows that induction of p-p65 precedes expression of YKL-40 upon treatment of TNF $\alpha$ .

(E) To examine potential sources of TNF $\alpha$  that could serve to maintain the MES phenotype in human GBM tumors we performed immunofluorescent staining with IBA (red), a marker that identifies macrophages/microglia, and we observed significant co-localization of IBA with TNF $\alpha$ . Bar graph shows percentage cells positive for each marker in three independent fields. Error bar indicates +/- SEM. Scale bar: 20  $\mu$ m.

(F) Immunofluorescent staining for YKL-40 and IBA in GBMs. YKL40 expression is shown in red and IBA is shown in green. Merged image of both proteins is shown against DAPI positive nuclei (blue). Scale bar: 100 $\mu$ m. Note that the two proteins rarely showed co-localization.

(G) Rapid isolation protocol for enrichment of macrophages/microglia using differential Percoll gradient from human surgical glioma samples. Left panel shows the FACS analysis of expression of CD11b and CD45 in isolated macrophages/microglia that were of high purity. Middle panel shows that isolated macrophages/microglia are HLA-DR<sup>+</sup> suggesting activation phenotype. ELISA analysis of secreted TNF $\alpha$  in the media of three independent acutely isolated macrophages/microglia. Bar graph shows average levels of TNF $\alpha$  secreted in the conditioned media after 48-96 h in culture. Error bar indicates +/- SEM.

(H) Western analysis shows the induction of p-p65 in GSC11 after addition of pooled rapidly isolated macrophages/microglia conditioned media (MG-CM) at the indicated timepoints.

(I) qRT-PCR analysis of MES genes in GSC11 after treatment with pooled macrophages/microglia conditioned media (MG-CM, n = 3) with or without pre-treatment with I $\kappa$ B-SR or control GFP adenovirus 24 h prior to exposure to MG-CM treatment. Treating GSC11 with MG-CM caused induction of MES genes, and this effect was significantly reduced



by pre-treatment with I $\kappa$ B-SR indicating that NF- $\kappa$ B activation by factors derived from macrophages/microglia can lead to MES differentiation of PN GSCs. We could not ascertain the specific contribution of TNF $\alpha$  in the MG-CM to MES differentiation since these samples were limited. Bar graphs indicate average of triplicate measurements and plotted as fold change of MG-CM treated versus untreated groups. Statistical significance was assessed using *t* test. Error bar indicates +/- SEM.

(J) Western blot analysis of MES markers and master TFs STAT3, C/EBP $\beta$  and TAZ after treating indicated MES GSCs with si-p65 for 72 h (left panel), BAY 11-7082 (10  $\mu$ M) for 96 h (middle panel) and minocycline (50  $\mu$ M) for 5 days (right panel). We raised the possibility that silencing NF- $\kappa$ B may impact the MES state of these cells. Consistently, transient knockdown of p65 was sufficient to reduce protein levels of YKL40, TAZ, and C/EBP $\beta$ , but not STAT3, implying that the p65 subunit is not required for maintenance of STAT3 expression. However, treatment of cells with I $\kappa$ B kinase inhibitor, BAY 11-7082, caused a decrease in expression of all three TFs suggesting that while the p65 subunit of NF- $\kappa$ B alone was not sufficient to alter STAT3, global inhibition of the NF- $\kappa$ B pathway had a suppressive effect on STAT3 expression. *In vitro* treatment of GSC2 and GSC20 also caused dramatic reduction of master TF expression as well as CD44 and FN1 within 4 days.

(K) Cell viability was detected using the WST-1 assay. Bar graphs indicate percentage of cells viable after a 5 day minocycline treatment (black bars) against untreated controls (gray bars). Error bar indicates +/- SD. *t* test was used for statistical significance. We observed a more profound minocycline induced reduction of cell viability of MES GSCs in comparison to PN GSCs.

(L) Representative bio-luminescence images of GSC20 (left panel) or GSC23 (right panel) transduced with pCignal lenti-CMV-luc injected into Foxn1<sup>nu</sup> mice. Cells were imaged 2-3 weeks after implantation as the first timepoint (week 1) after which the radiation group received four cycles of 2.5 Gy IR on consecutive days. We treated mice bearing xenografts with 50 mg/kg minocycline starting four days prior to radiation. Minocycline treatment strongly reduced tumor growth in X-GSC20 and the effect was additive when combined with radiation, while radiation alone had modest, but not statistically significant reduction in tumor volume compared to the control group. To test whether the effect of minocycline was specific for the MES GSCs, we treated implanted GSC23 intracranially into mice and followed the same treatment regimen as GSC20. As expected, radiation caused a decrease in tumor volume compared to control groups but minocycline had no significant effect on tumor size (right panel). Thus, minocycline specifically had antitumor effects only on MES GSCs in the xenograft model. Black bar shows average radiance (photons/s/cm<sup>2</sup>/sr) with various treatments and time points. Error bar indicates +/- SEM. Color key for luminescence is shown on the right. *t* test was used to assess statistical significance. NS = not significant.

(M) Stacked bar graph shows percentage of mice exhibiting features of AA or GBM within each group. To discern if minocycline treatment influenced tumor grade, we inspected hematoxylin and eosin (H&E) stained sections from all groups. Tumors from GSC20 injected mice predominantly showed features of GBM (with tumor necrosis), whereas those treated with minocycline lacked necrosis while still exhibiting features of grade III AAs.

(N) IHC analysis of various markers in GSC20 xenograft tumors that were treated with minocycline alone or in combination with IR compared to untreated mice. Upper panel shows the representative H&E staining. Middle and lower panel show the expression of YKL-40 and OLIG2 respectively. A significant reduction in the expression of YKL40 and CD44 (data not shown) was seen in all tumors treated with minocycline. A subset of mice treated with minocycline (n = 2 out of 5) and those with both minocycline and radiation (n = 2 out of 5) showed OLIG2 staining in about 10-60% of the tumor area, although the induction of PN genes was not seen *in vitro*. Scale bar: 100  $\mu$ m.

(O) GSCs were treated with TNF $\alpha$  for 96 h with or without pre-treatment with I $\kappa$ B-SR or control GFP adenovirus 24 h prior to TNF $\alpha$  treatment followed by plating onto glass slides coated with laminin/poly-L-ornithine. 24 h later, cells were irradiated with 3 Gy and immunostained with anti- $\gamma$ -H2AX antibody and the number of foci per nuclei was counted. Bar graphs indicate average number of foci per nuclei in at least 25 nuclei. Error bar indicates +/- SD. Statistical significance was assessed using *t* test.

(P) Bar graphs indicate the average percentage of neurosphere formation of post irradiated GSCs compared to control group. Error bar indicates +/- SD. Statistical significance was assessed using *t* test.

A

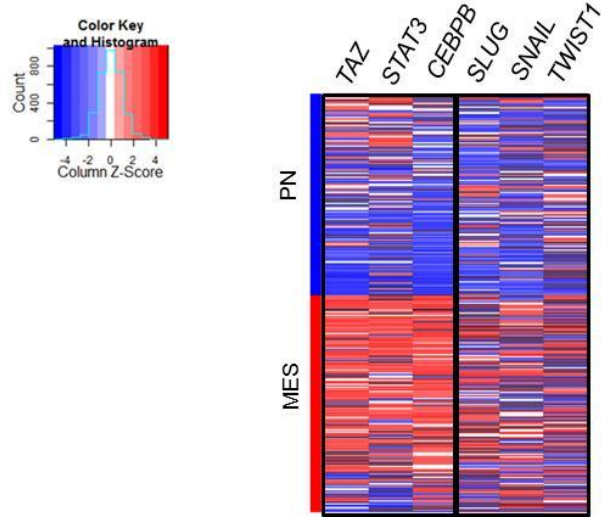

B

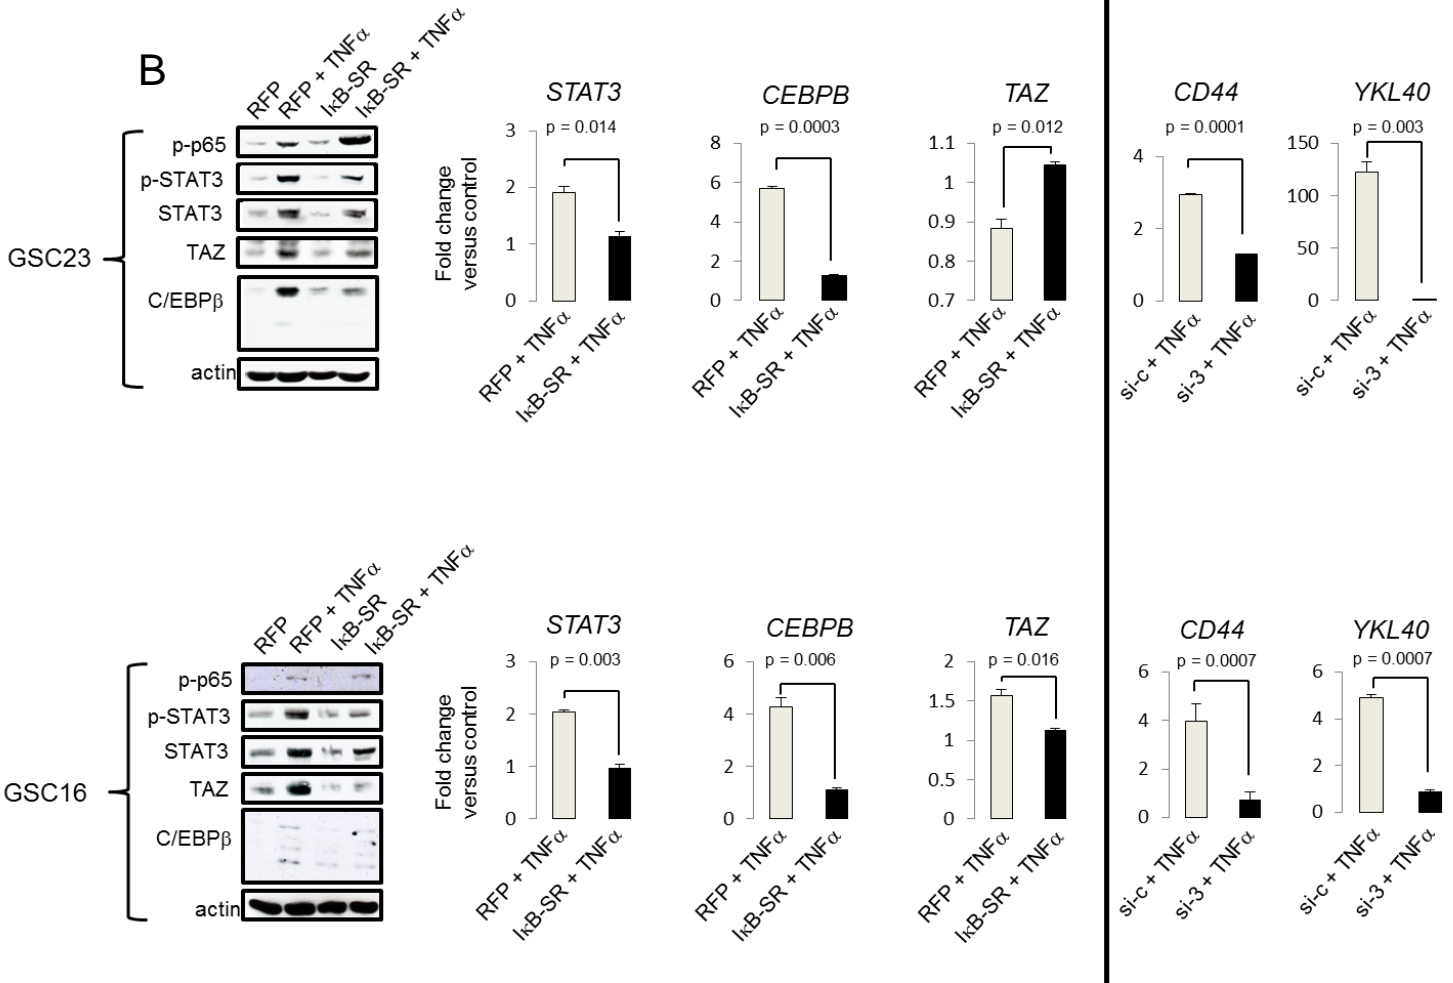

**Figure S6, related to Figure 6.**

(A) Heatmap showing the expression of master TFs, *STAT3*, *CEBPB*, *TAZ*, and EMT inducers, *SNAIL*, *SLUG* and *TWIST1* in PN and MES tumors from the TCGA.

(B) Left panel shows the western blot analysis of MES master TFs markers *STAT3*, *C/EBPβ* and *TAZ* in GSC23 and GSC16 pre-treated with I $\kappa$ B-SR or control RFP for 36 h prior to TNF $\alpha$  treatment for an additional 24h. Bar graphs show the qRT-PCR analysis of master TFs after similar treatments as above. Right panel shows qRT-PCR analysis of *YKL40*, and *CD44* gene expression after knockdown of all three master TFs (*STAT3*, *C/EBPβ* and *TAZ*). Cells were treated with siRNA 72h prior to treatment with TNF $\alpha$  for an additional 24 h. *t* test was used for statistical significance.

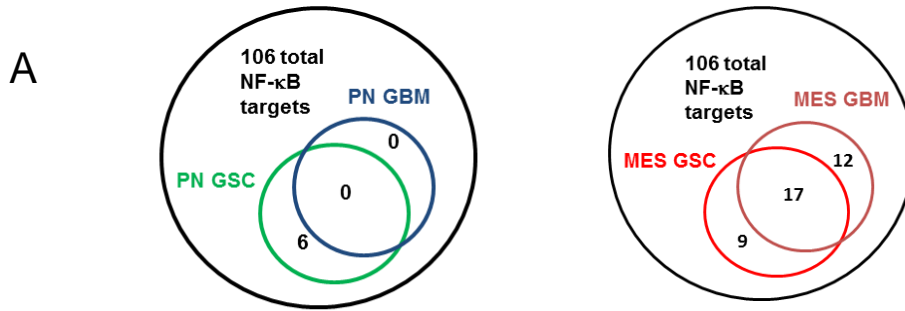

\$Venn\_List\$NF.kBGSC  
 [1] "CCND1" "CD74" "MYC" "PTX3" "TNC" "TP53"

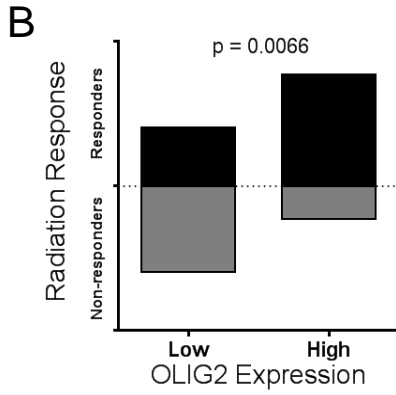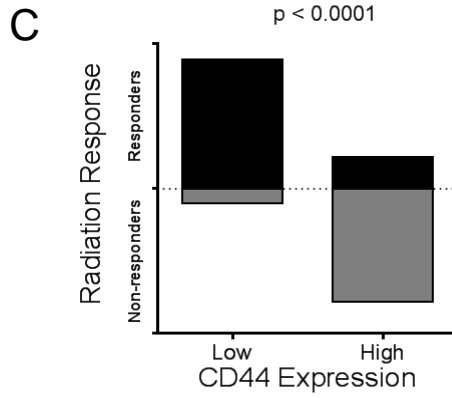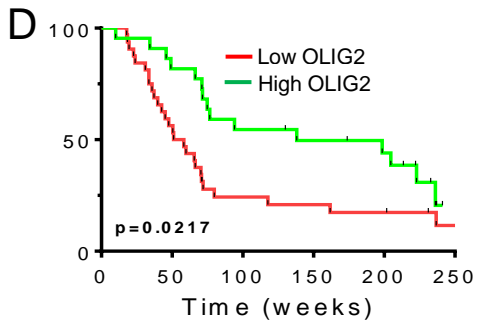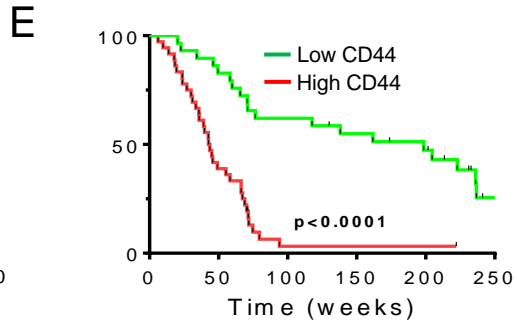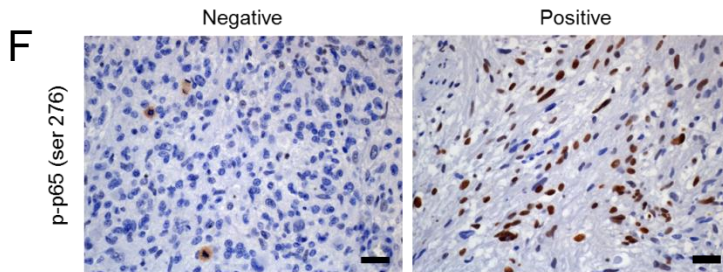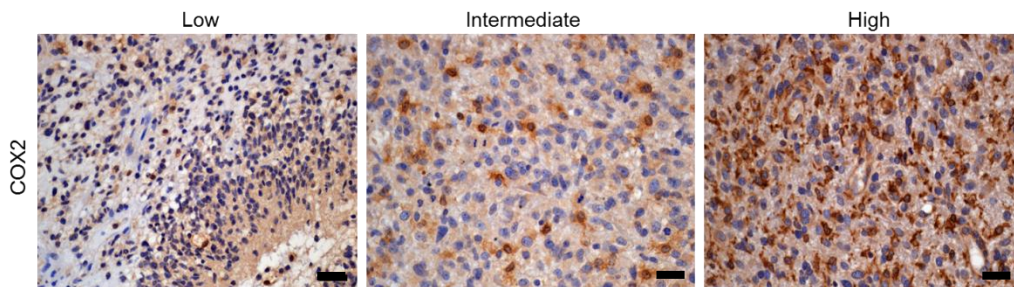

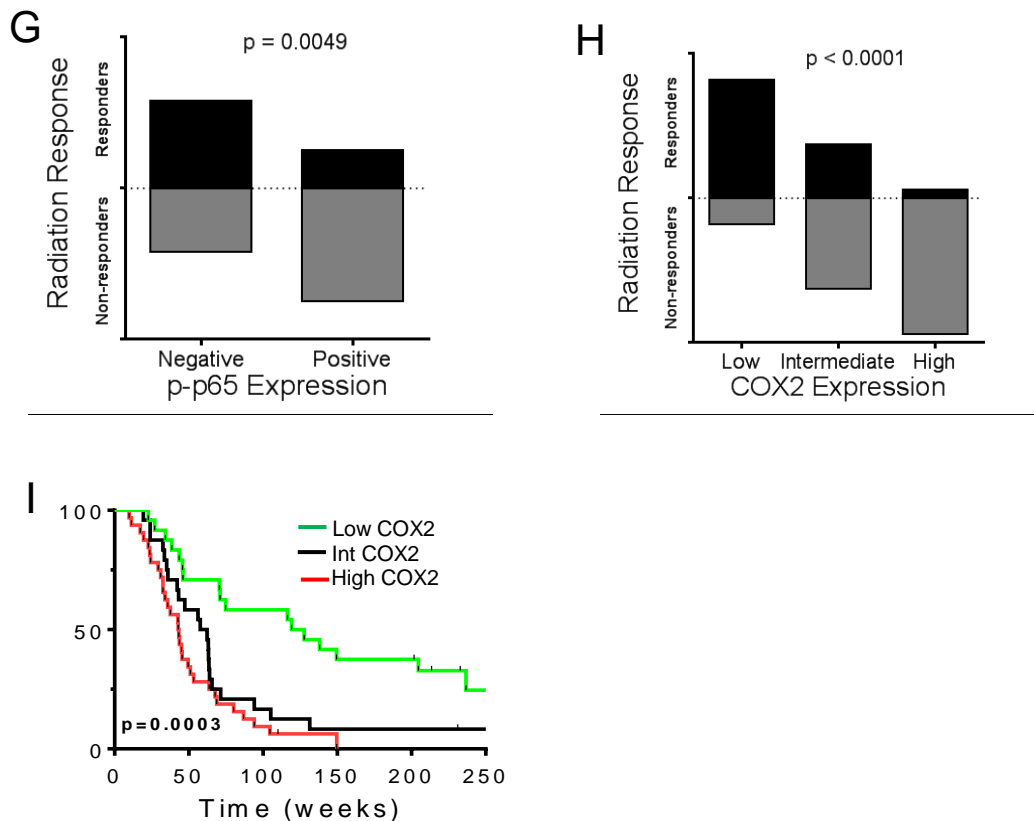

**Figure S7, related to Figure 7.**

(A) Venn diagram showing overlap of NF- $\kappa$ B target genes between PN/MES GBMs from TCGA and PN/MES GSCs from our study that showed 1.5 fold or greater induction compared to tumors/GSCs. The NF- $\kappa$ B targets enriched in the PN tumors/GSCs (v/s MES) are shown below, whereas those enriched in MES tumors/GSCs (v/s PN) are listed in Table S6.

(B) Bar graph showing the proportion of OLIG2, and (C) CD44 expression in newly diagnosed GBM patients classified as RT responders or non-responders. Chi square test was used to assess statistical significance. Number of samples tested for each marker is shown in Table S7. Kaplan Meier curves showing survival of newly diagnosed GBM patients based on OLIG2 (D), and CD44 (E) is shown below. Log rank test was used to assess statistical significance.

(F) Representative IHC staining of GBM tissues with p-p65 (ser 276, above) and COX2 (below) is shown. Scale bar: 20 $\mu$ m.

(G) Bar graph showing the proportion of p-p65, or (H) COX2 expression in newly diagnosed GBM patients classified as RT responders or non-responders. Chi square test was used to assess statistical significance. Number of samples tested for each marker is shown in Table S7.

(I) Kaplan Meier curves showing survival of newly diagnosed GBM patients based on COX2 is shown Log rank test was used to assess statistical significance.

**Table S6 related to Figure 7. NF- $\kappa$ B target genes specific to the MES subtype**

| Gene Symbol    | Description                                                                               | GSC | GBM |
|----------------|-------------------------------------------------------------------------------------------|-----|-----|
| <i>CD44</i>    | CD44 molecule (Indian blood group)                                                        | +   | +   |
| <i>CCL2</i>    | chemokine (C-C motif) ligand 2                                                            | +   | +   |
| <i>CXCL5</i>   | chemokine (C-X-C motif) ligand 5                                                          | +   | +   |
| <i>HMOX1</i>   | heme oxygenase (decycling) 1                                                              | +   | +   |
| <i>IER3</i>    | immediate early response 3                                                                | +   | +   |
| <i>ICAM1</i>   | intercellular adhesion molecule 1                                                         | +   | +   |
| <i>IRF1</i>    | interferon regulatory factor 1                                                            | +   | +   |
| <i>IL1B</i>    | interleukin 1, beta                                                                       | +   | +   |
| <i>IL15</i>    | interleukin 15                                                                            | +   | +   |
| <i>IL15RA</i>  | interleukin 15 receptor, alpha                                                            | +   | +   |
| <i>IL8</i>     | interleukin 8                                                                             | +   | +   |
| <i>NQO1</i>    | NAD(P)H dehydrogenase, quinone 1                                                          | +   | +   |
| <i>PTGS2</i>   | prostaglandin-endoperoxide synthase 2 (prostaglandin G/H synthase and cyclooxygenase)     | +   | +   |
| <i>PSMB9</i>   | proteasome (prosome, macropain) subunit, beta type, 9 (large multifunctional peptidase 2) | +   | +   |
| <i>S100A6</i>  | S100 calcium binding protein A6                                                           | +   | +   |
| <i>TFPI2</i>   | tissue factor pathway inhibitor 2                                                         | +   | +   |
| <i>TNFAIP3</i> | tumor necrosis factor, alpha-induced protein 3                                            | +   | +   |
| <i>BCL2A1</i>  | BCL2-related protein A1                                                                   | -   | +   |
| <i>CD48</i>    | CD48 molecule                                                                             | -   | +   |
| <i>CCL5</i>    | chemokine (C-C motif) ligand 5                                                            | -   | +   |
| <i>CCR5</i>    | chemokine (C-C motif) receptor 5                                                          | -   | +   |
| <i>FAS</i>     | Fas (TNF receptor superfamily, member 6)                                                  | -   | +   |
| <i>IL6</i>     | interleukin 6 (interferon, beta 2)                                                        | -   | +   |
| <i>MMP9</i>    | matrix metalloproteinase 9 (gelatinase B, 92kDa gelatinase, 92kDa type IV collagenase)    | -   | +   |
| <i>PTX3</i>    | pentraxin 3, long                                                                         | -   | +   |
| <i>PLAU</i>    | plasminogen activator, urokinase                                                          | -   | +   |
| <i>SOD2</i>    | superoxide dismutase 2, mitochondrial                                                     | -   | +   |
| <i>TNC</i>     | tenascin C                                                                                | -   | +   |
| <i>VCAM1</i>   | vascular cell adhesion molecule 1                                                         | -   | +   |
| <i>CSF2</i>    | colony stimulating factor 2 (granulocyte-macrophage)                                      | +   | -   |
| <i>IRF2</i>    | interferon regulatory factor 2                                                            | +   | -   |
| <i>IRF7</i>    | interferon regulatory factor 7                                                            | +   | -   |
| <i>IL1A</i>    | interleukin 1, alpha                                                                      | +   | -   |
| <i>IL11</i>    | interleukin 11                                                                            | +   | -   |
| <i>NFKBIA</i>  | nuclear factor of kappa light polypeptide gene enhancer in B-cells inhibitor, alpha       | +   | -   |
| <i>NOD2</i>    | nucleotide-binding oligomerization domain containing 2                                    | +   | -   |
| <i>STAT5A</i>  | signal transducer and activator of transcription 5A                                       | +   | -   |
| <i>VEGFC</i>   | vascular endothelial growth factor C                                                      | +   | -   |

List of published NF- $\kappa$ B target genes that show 1.5 or greater expression in the MES class compared to PN is shown. Genes that are relatively higher in either or both TCGA tumors as well as GSCs are shown with a “+”.



**Table S7 related to Figure 7. Cohort of patients used for clinical analyses**

| <b>Parameter</b>                          | <b>Number (percentage)</b>                                                                       |
|-------------------------------------------|--------------------------------------------------------------------------------------------------|
| <b>Total no. of patients</b>              | 206 (100)                                                                                        |
| <b>Age (median, range) in years</b>       | 56.9 (18.9-84.2)                                                                                 |
| <b>Follow-up (median, range) in weeks</b> | 64.7 (6.1-673)                                                                                   |
| <b>Vital status</b>                       | Censored=28 (14)<br>Deceased=176 (85)<br>Unknown=2 (1)                                           |
| <b>Karnofsky Performance Status</b>       | 50=1 (0.5)<br>60=7 (3)<br>70=15 (7)<br>80=45 (22)<br>90=87 (42)<br>100=18 (9)<br>Unknown=33 (16) |
| <b>RT Response</b>                        | Stable/Responders=105 (51)<br>Non-responders=99 (48)<br>Unknown=2 (1)                            |
| <b>IDH1 Status</b>                        | Mutant=122 (59)<br>Wild-type=21 (10)<br>Unknown=63 (31)                                          |
| <b>CD44</b>                               | High=37 (18)<br>Low=29 (14)<br>Unknown=140 (68)                                                  |
| <b>OLIG2</b>                              | High=23 (11)<br>Low=32 (16)<br>Unknown=151 (74)                                                  |
| <b>p-p65</b>                              | High=53 (26)<br>Low=27 (13)<br>Unknown=126 (61)                                                  |
| <b>COX2</b>                               | High=33 (16)<br>Intermediate=24 (12)<br>Low=24 (12)<br>Unknown=125 (60)                          |

**Table S8 related to Figure 7.** Data showing significant predictors of radiation response using a generalized linear model.

| Variable                    | Parameter Estimate | 95% CI         | p value |
|-----------------------------|--------------------|----------------|---------|
| MES (low vs. high)          | -0.73              | -1.22 to -0.28 | 0.0014  |
| <i>IDH1</i> (WT vs. mutant) | -0.09              | -0.75 to 0.56  | 0.7738  |
| KPS ( $\leq 70$ vs $> 70$ ) | -0.78              | -1.99 to 0.32  | 0.1661  |
| Age ( $\leq 50$ vs $> 50$ ) | 0.27               | -0.66 to 1.20  | 0.569   |

**Table S9 related to Figure 8.** Serial section IHC of various markers in newly diagnosed GBM

|              | <b>OLIG2</b> | <b>CD44</b> | <b>p-p65</b> | <b>IBA</b> |
|--------------|--------------|-------------|--------------|------------|
| <b>GBM1</b>  |              |             |              |            |
| 1            | INT          | LOW         | +            | INT        |
| 2            | LOW          | HIGH        | +            | HIGH       |
| 3            | INT          | HIGH        | +            | HIGH       |
|              |              |             |              |            |
| <b>GBM2</b>  |              |             |              |            |
| 1            | HIGH         | LOW         | -            | INT        |
| 2            | HIGH         | LOW         | -            | HIGH       |
|              |              |             |              |            |
| <b>GBM3</b>  |              |             |              |            |
| 1            | HIGH         | LOW         | -            | LOW        |
| 2            | HIGH         | LOW         | -            | LOW        |
| 3            | LOW          | HIGH        | -            | HIGH       |
|              |              |             |              |            |
| <b>GBM4</b>  |              |             |              |            |
| 1            | HIGH         | LOW         | +            | INT        |
| 2            | LOW          | HIGH        | +            | HIGH       |
| 3            | LOW          | HIGH        | +            | HIGH       |
|              |              |             |              |            |
| <b>GBM5</b>  |              |             |              |            |
| 1            | HIGH         | LOW         | +            | HIGH       |
| 2            | HIGH         | LOW         | +            | HIGH       |
|              |              |             |              |            |
| <b>GBM6</b>  |              |             |              |            |
| 1            | HIGH         | LOW         | -            | HIGH       |
| 2            | LOW          | HIGH        | +            | HIGH       |
| 3            | LOW          | HIGH        | +            | HIGH       |
|              |              |             |              |            |
| <b>GBM7</b>  |              |             |              |            |
| 1            | HIGH         | LOW         | -            | LOW        |
| 2            | LOW          | HIGH        | +            | HIGH       |
|              |              |             |              |            |
| <b>GBM8</b>  |              |             |              |            |
| 1            | LOW          | HIGH        | +            | HIGH       |
| 2            | LOW          | HIGH        | +            | HIGH       |
| 3            | LOW          | HIGH        | +            | HIGH       |
|              |              |             |              |            |
| <b>GBM9</b>  |              |             |              |            |
| 1            | LOW          | HIGH        | +            | HIGH       |
| 2            | HIGH         | LOW         | +            | INT        |
| 3            | LOW          | HIGH        | +            | HIGH       |
|              |              |             |              |            |
| <b>GBM10</b> |              |             |              |            |
| 1            | HIGH         | LOW         | -            | INT        |
| 2            | HIGH         | LOW         | -            | INT        |

The expression of OLIG2, CD44, p-p65 (ser 276), and IBA in GBM was analyzed by IHC on consecutive 5  $\mu$ m sections. Numbers indicate independent areas within each tumor. IBA-specific staining of macrophages/microglia infiltration was classified as low (<10% tumor area), intermediate (10-30%) or high (>30%).

## **Supplemental Experimental Procedures**

### **Bio-informatic analyses**

The top 500 genes with the highest median absolute deviation were identified, then subjected to unsupervised hierarchical cluster analysis, using Cluster 3.0 and Java Treeview (Eisen et al., 1998). Cluster genes were analyzed using the DAVID webtool (<http://david.abcc.ncifcrf.gov/>) to assign GO categories and plotted as previously described (Dennis et al., 2003). For GSEA analysis, a ranked list of all of the genes on the Affymetrix HGU133A version 2.0 genechips was generated taking the average expression of cluster 2 GSCs minus cluster 1 GSCs for each gene. Independently, ranked gene lists were obtained from previous studies for the MES and PN signatures (Phillips et al., 2006; Verhaak et al., 2010) taking the average expression of the two signatures, generated from the two datasets and subject to GSEA. For the PN/MES metagene calculation (Figures 2A, S2C, and S2G), RNA from GSCs, their respective originating GBM tumor, and mouse xenograft were prepared and the expression of four PN (*DLL3*, *OLIG2*, *ASCL1*, and *NCAM1*), and four MES (*YKL40*, *SERPINE1*, *TIMP1*, and *TGFBI*) genes were analyzed by qRT-PCR. Using the delta Ct values, composite metagenes were then calculated as noted above, then Z-score corrected, and the PN metagene score was subtracted from the MES score to generate values for a comparative heatmap. A five gene metagene (using *DLL3*, *OLIG2*, *YKL40*, *TGFBI*, and *TIMP1*) was used for Figure 7B and C. For the methylation analysis, DNA isolated from GSCs were profiled using the Illumina Infinium methylation array. For the TCGA samples (G-CIMP<sup>+</sup>: TCGA-16-0849, TCGA-16-1460; G-CIMP<sup>-</sup>: TCGA 02-0052, TCGA 02-0054), level 3 Illumina Infinium data was downloaded. The two sets of data (GSC and TCGA GBM) were batch corrected using the COMBAT algorithm. Methylation probes for the G-CIMP<sup>+</sup> (as identified by Noushmehr et al. 2010) were limited to only those probes available on both methylation platforms were used. All methylation probes in common between the two methylation platforms that had a  $\beta$ -value > 0.5 were used, after filtering out probes that were non-variably methylated among all 9 samples (i.e. hypermethylated to a similar degree in all 9 samples). The G-CIMP methylation signature included PN/hypermethylated genes with a p value cutoff of less than 0.05 (n=1520 transcripts). These genes were then mapped back to Infinium methylation probes (n= 2562 probes). The probe list was further filtered to remove probes that had missing data in the four samples (n = 2480 probes remaining). The complete NF- $\kappa$ B target gene list was downloaded from <http://www.bu.edu/nf-kb/gene-resources/target-genes/>. Expression of *STAT3*, *CEBPB*, and *TAZ* was analyzed in three independent published datasets for GBM expression profiles: the Rembrandt (Madhavan et al., 2009), TCGA (TCGA, 2008) and the Erasmus datasets (Gravendeel et al., 2009). For the NF- $\kappa$ B metagene, the average expression of its downstream targets listed in Table S6 was used. Normalized values were compared across datasets after dividing tumors based on *CD44* expression above or below the median.

## **LOH analysis**

Genomic DNA was isolated from GSCs (Epicenter) following proteinase K treatment. Six microsatellite markers along chromosome 10q were selected for loss of heterozygosity (LOH) analysis. The list of markers and the primers used for PCR are listed in Supplemental Experimental Procedures. The microsatellite marker sequences, size and their corresponding locations on chromosome 10q were obtained from the Cooperative Human Linkage Centre, Genethon and UniSTS. The microsatellite loci were PCR amplified using 50 ng genomic DNA, locus specific FAM-labeled primers and the Amplitaq gold PCR master mix (Applied Biosystems). The PCR products were analyzed with an automated ABI 377 sequencer and Genescan 2.1 software (Applied Biosystems). A heterozygosity index (number of informative cases/total number of cases analyzed per marker) was calculated for each of the six microsatellite markers using normal brain tissue from ten autopsy cases. All of the six markers used in the study had a heterozygosity index of  $\geq 0.8$ . Due to lack of availability of matched normal tissue, an LOH scoring system was devised based on the assumption that if 5 or more of the highly informative markers used in the study were homozygous, a call of LOH would be made.

## **EGFR amplification**

Genomic DNA was subject to real time PCR based copy number assay for EGFR (Hs04942325\_cn) and the copy number reference assay HTERT (4403316) from Applied Biosystems. Normal brain DNA was used as the normalizer for copy number calculations. The delta delta Ct method was used with normal brain as the reference to calculate a fold change. Copy number was calculated using the formula  $2 \times \text{delta delta Ct}$ . Copy number values for the GSC lines were calculated relative to normal brain.

## **NF1 mutation**

PCR products were amplified from genomic DNA templates using primers spanning *NF1* (Parsons et al., 2008) with Platinum Taq polymerase per the manufacturer's protocol. The products were then Sanger sequenced to determine mutations (Beckman Coulter Genomics).

## **Methylation assay**

MethyLight assay was performed as described earlier (Noushmehr et al., 2010) on a panel of eleven markers that included *ANKRD43*, *HFE*, *MAL*, *LGALS3*, *RHOF*, *ADPRH*, *COL21A1*, *HSD11B2*, *RAB27B*, *RILP*, and *SLITL2*. *COL2A1* was used as a control. Briefly, genomic DNA from all the GSCs and matched human GBM tumors was isolated and bisulfite converted (Zymo Research, Orange, CA), amplified, and detected by MethyLight real-time PCR strategy as described previously (Eads et al., 2000; Eads et al., 1999).

## **IDH1 mutation analysis**

Genomic DNA samples from GSCs were tested for *IDH1* WT and R132H mutation using the Competitive Allele-Specific Taqman PCR (Applied Biosystems). For the tumor specimens, either the PCR method or IHC using an R132H antibody as described below was used.

## **IHC analysis**

Tumors embedded in paraffin blocks were deparaffinized, and hydrated through an ethanol series. After microwave antigen retrieval, antibodies against YKL40 (Santa Cruz), OLIG2 (IBL), Nestin (Santa Cruz), CD44 (BD Biosciences), EGFR (Invitrogen), p-p65 (ser 276, Cell signaling), COX2 (Novus Biologicals), IBA (Waco), or IDH1 mut (specific for R132H, Dianova GmbH) were incubated with the slides overnight at 4°C. Staining was performed using the DAKO Envision kit according to the manufacturer's instructions (DAKO). For frozen sections, fixation of the tissue sections was performed using 4% paraformaldehyde in PBS for 10-20 minutes. Blocking and overnight antibody incubation was performed using 1% normal serum and 2% BSA in PBS followed by exposure to fluorescent conjugated secondary antibody. After counterstaining with Hoechst dye, sections were mounted and imaged. Tumors were classified as follows: low (no expression or less than 10% tumor area), intermediate staining (10-30% tumor area or weak expression throughout the tumor), or high (>30% tumor area). p-p65 staining was classified as negative or positive for each tumor.

## **Patient radiation response studies**

The radiation therapy response was determined by comparing the change in enhancing tumor size between the post-surgical assessment and first post-radiation therapy MRI in previously described manner (Pelloski et al., 2005). Progression was documented by evaluation of serial MRI imaging and dated from the first appearance of progression on MRI, thus minimizing the misclassification of pseudoprogression as true progression. Cases in which progression was not seen in subsequent scans and/or for which subsequent resection failed to identify tumor were deemed pseudoprogression and not counted as progression events. Cases in which only one MRI was available documenting suspected progression were coded as progression. The association of responders/non-responders to IHC expression was performed using Chi Square test. A generalized linear model was constructed using a binomial distribution to determine significant predictors of radiation response (Table S8).

## **Flow Cytometry**

Human GBM patient derived tumor cells as well as human GSCs were dissociated into single cell suspension and stained with primary antibodies against CD133, CD15, and/or CD44 (BD Biosciences), according to manufacturer's instructions. For unconjugated primary antibodies either FITC or PE conjugated secondary antibodies was used after primary antibody incubation. For isotype controls either PE or FITC conjugated immunoglobulins were used. The stained cells were analyzed using a BD LSR II flow cytometer and Fluorescence activated cell sorting (FACS) was performed on a BD Aria II cell sorter (Becton Dickinson). For surgical specimens a fluorescent live cell probe, Calcein-AM (0.4µM, Invitrogen), was added to the staining protocol for cells isolated from fresh specimens to help gate out the cell population from debris in addition to the forward and side scatters.

## **Cell cycle analysis**

GSCs after various treatments were pelleted by centrifugation, and dissociated with Accutase (Sigma) by using a 1 ml sterile pipette. Cells were washed with PBS to remove Accutase and resuspended in 1 ml of cold PBS and fixated with 2 ml of 100% pre-cooled ethanol. After

fixation overnight, cells were resuspended, and washed with FACS buffer (0.5% BSA, 25 mM EDTA in PBS). Cell pellets were then re-suspended in 800  $\mu$ l of FACS buffer containing 20  $\mu$ l of RNase A (10 mg/ml) and incubated at 37<sup>0</sup>C for 30 mins. After the incubation period, cells were treated with 50  $\mu$ l of propidium iodide (500  $\mu$ g/ml) and cell cycle analysis was performed by using the FACS Calibur flow cytometer (BD Biosciences) followed by analysis by FlowJo (Tree Star Inc.).

### **$\gamma$ -H2AX assay**

Cells were placed in chamber slides coated with laminin/poly-L-ornithine coated coverslips 24 h prior to treatments. At the indicated timepoints cells were fixed in 4% paraformaldehyde, permeabilized with 0.1% Triton-X/PBS and stained with  $\gamma$ -H2AX antibody (R&D systems) according to standard protocols. The number of foci formed was counted in at least 25 nuclei for each group.

### **Apoptosis assay**

Apoptosis assay was performed using the Annexin V:PE apoptosis detection kit (BD Biosciences) according to the manufacturer's instructions.

### **Neurosphere assay**

Cells were seeded at 3 cells per well in triplicate 96 well plates (radiation assay) or in equal number in 6 well plates (growth factor assay). For radiation assays, total number of spheres was counted after 3 weeks and control cell sphere number was set to 100% and compared to treatment groups. For growth factor assays, number of spheres (>50  $\mu$ M) in diameter were counted in five randomly chosen fields and plotted as mean.

### **DNA, RNA isolation, Real time qRT-PCR and western blotting**

Total DNA or RNA from GSCs or formalin fixed, paraffin embedded tumor tissues was prepared using the Masterpure complete DNA and RNA isolation kit (Epicenter) after proteinase K digestion according to the manufacturer's instructions. Inventoried Taqman probes were obtained from Applied Biosystems and qRT-PCR reactions were performed as described previously (Bhat et al., 2011). For western blotting, protein lysis was performed in 0.5% NP-40 lysis buffer and western blot analysis was performed as previously described (Bhat et al., 2011). Antibodies against STAT3, p-STAT3, p-p65 (ser 536, Cell Signaling), p65, YKL-40, C/EBP $\beta$  (Santa Cruz Biotechnologies), OLIG2 (IBL), SOX9 (Novus Biologicals), FN1 (BD Biosciences), CD44 (BD Biosciences), TAZ (Novus Biologicals) and actin (Calbiochem) were purchased commercially.

### **Macrophages/microglia isolation**

Glioma derived macrophages/microglia were isolated as previously described (Olah et al., 2012). Briefly, tumor tissue was mechanically disrupted in a glass homogenizer and filtered through 70  $\mu$ m cell strainer and the resulting cell suspension was centrifuged for 10 min to obtain a cell pellet. The cell pellet was resuspended in Percoll gradient (Percoll 60, 40%, and PBS) and was centrifuged for 20 min at 950 g. The interface consisting of macrophages/microglia was collected, washed, and analyzed by flow cytometry. Cell



suspensions were incubated with human Fc receptor binding inhibitor (eBioscience) to avoid nonspecific staining. The purity of macrophages/microglia was determined by fluorescently labeled primary antibodies directed against CD11b (BioLegend) and CD45 (BioLegend) and the cell viability was determined by DRAQ5 (Biostatus). The surface expression of above mentioned markers was determined by FACS Calibur flow cytometer (Becton Dickinson) and analyzed using WinMDI 2.8 software. Purity was defined as the percentage of DRAQ5 positive cells, showing CD11b<sup>high</sup> and CD45<sup>int</sup> expression. Conditioned media was collected from CD11b and CD45 enriched macrophages/microglia plated in 5% serum containing media. After 48-96h of post plating macrophages/microglia conditioned media was collected and filtered through 0.45 µm filters and stored at -80°C for later experiments.

## WST1 assay

Viability of GSCs treated with minocycline was determined using the WST1 assay kit from Clontech. Cells were seeded at 10,000 cells per well in a 96 well plate in at least 3-4 wells with or without minocycline for 5 days after which 10 µl of pre-mixed WST reagent was added per well and absorbance measured at 450 nm after 3 hours.

## Primers

| Assay type | Assay name | Forward Primer Sequence (5' to 3') | Reverse Primer Sequence (5' to 3') | Probe Oligo Sequence (5' to 3')      |
|------------|------------|------------------------------------|------------------------------------|--------------------------------------|
| CIMP       | ANKRD43    | TCGTCGGTATCGAGTAGCGG               | CGATACTAAACTTCCTACAAAAACACGAC      | AATACGCAACTCCGAACACTAAACCCTTC        |
| CIMP       | HFE        | TTTTTGATGTTTTGTAGATCGCG            | CGCGCCCTAATTCGC                    | CGAACTCACGCAACAACGCCCTA              |
| CIMP       | MAL        | GTTCGGGTAGGATTTAGCGTC              | ATCTACAATAAAAAATAAACCGACCG         | CGACCGCCGCCCTCCG                     |
| CIMP       | LGALS3     | GCGGAGTTTCGTGGTTTTCG               | AATAACCAAACACTACGACTCGTCACC        | CCGAAAAACGCAACGACGAAAAATACGACG       |
| CIMP       | RHOF       | GTCGTAGTCGTCGTTTTACG               | GCTACGAACTCCGAACAATAAATACC         | AAACCCTAACCCAAACCGCCGCC              |
| CIMP       | ADPRH      | TGTATAGTTCCGGTACGAGAATGTG          | TTTAACGTTTCGCTTTCAAACG             | TCGTGAAAAGTTTAGAGGAGTT               |
| CIMP       | COL21A1    | CGTTGTAGGGAGAACGGATTTTC            | CCGAACAAAACCTACGCTAAAAC            | CGGAGGGTAGTTAATT                     |
| CIMP       | HSD11B2    | CGCGGTGGTCCGATTAGT                 | ACATACCACTCACGCTTATTGAA            | AAGGGTATCGGGATGTC                    |
| CIMP       | RAB27B     | GCGGATCGTTCCGTTTTG                 | CAAAACGATAAACACGAAAACAACACTAC      | TCGGAGTTATAGGTTGGAGG                 |
| CIMP       | RILP       | GGATCGATAGCGGGACGAAT               | CACCGCCTCGATCTCCTAAC               | TCGGGCGTATAATC                       |
| CIMP       | SLITL2     | ACGCGGATTCGAACGTAGTT               | CCGCGACCTCAATCTTTCC                | TCGGGTTGATTTCGT                      |
| Reference  | COL2A1     | TCTAACAAATTATAAACTCCAACCACCAA      | GGGAAGATGGGATAGAGGGAATAT           | CCTTCATTCTAACCCAATACCTATCCCACCTCTAAA |

| LOH (Chr. 10) assay | Forward Primer Sequence (5' to 3') | Reverse Primer Sequence (5' to 3') |
|---------------------|------------------------------------|------------------------------------|
| D10S2472            | TCTCCCACTACATATAACTAAAAACC         | GAAGGCACCAATCCATTCAT               |
| D10S2470            | TCAAGCTTGCAGACAGCCTA               | CATCAAGCATACTGTATTAGTTAGGG         |
| D10S1242            | CATGTTTAAACCATCAAGCATACTG          | TCAAGCTTGCAGACAGCCTA               |
| D10S541             | CATGGAATCTTTGAAGAACTGG             | GGGCCTGCCAGTGAATAGT                |
| D10S2322            | CCTGGGAGTAGCAGCAATAG               | CCCTCTCCCTACAATGTCTCT              |
| D10S1683            | TTAAGTGCCAAATGCCAATC               | TGCTAACACGACAGTATCCCAGAC           |

## **Supplemental References**

- Abreu, J. G., Ketpura, N. I., Reversade, B., and De Robertis, E. M. (2002). Connective-tissue growth factor (CTGF) modulates cell signalling by BMP and TGF-beta. *Nat Cell Biol* 4, 599-604.
- Bally-Cuif, L., Goridis, C., and Santoni, M. J. (1993). The mouse NCAM gene displays a biphasic expression pattern during neural tube development. *Development* 117, 543-552.
- Bergheim, I., Guo, L., Davis, M. A., Duveau, I., and Arteel, G. E. (2006). Critical role of plasminogen activator inhibitor-1 in cholestatic liver injury and fibrosis. *J Pharmacol Exp Ther* 316, 592-600.
- Bommarito, A., Richiusa, P., Carissimi, E., Pizzolanti, G., Rodolico, V., Zito, G., Criscimanna, A., Di Blasi, F., Pitrone, M., Zerilli, M., et al. (2011). BRAFV600E mutation, TIMP-1 upregulation, and NF-kappaB activation: closing the loop on the papillary thyroid cancer trilogy. *Endocr Relat Cancer* 18, 669-685.
- Caiazzo, M., Dell'Anno, M. T., Dvoretzkova, E., Lazarevic, D., Taverna, S., Leo, D., Sotnikova, T. D., Menegon, A., Roncaglia, P., Colciago, G., et al. (2011). Direct generation of functional dopaminergic neurons from mouse and human fibroblasts. *Nature* 476, 224-227.
- Campagnoli, C., Roberts, I. A., Kumar, S., Bennett, P. R., Bellantuono, I., and Fisk, N. M. (2001). Identification of mesenchymal stem/progenitor cells in human first-trimester fetal blood, liver, and bone marrow. *Blood* 98, 2396-2402.
- Capela, A., and Temple, S. (2002). LeX/ssea-1 is expressed by adult mouse CNS stem cells, identifying them as nonependymal. *Neuron* 35, 865-875.
- Casarosa, S., Fode, C., and Guillemot, F. (1999). Mash1 regulates neurogenesis in the ventral telencephalon. *Development* 126, 525-534.
- Cheng, L. C., Pastrana, E., Tavazoie, M., and Doetsch, F. (2009). miR-124 regulates adult neurogenesis in the subventricular zone stem cell niche. *Nat Neurosci* 12, 399-408.
- Cheung, M., and Briscoe, J. (2003). Neural crest development is regulated by the transcription factor Sox9. *Development* 130, 5681-5693.
- D'Amour, K. A., and Gage, F. H. (2003). Genetic and functional differences between multipotent neural and pluripotent embryonic stem cells. *Proc Natl Acad Sci U S A* 100 Suppl 1, 11866-11872.
- Eads, C. A., Danenberg, K. D., Kawakami, K., Saltz, L. B., Blake, C., Shibata, D., Danenberg, P. V., and Laird, P. W. (2000). MethyLight: a high-throughput assay to measure DNA methylation. *Nucleic Acids Res* 28, E32.

- Eads, C. A., Danenberg, K. D., Kawakami, K., Saltz, L. B., Danenberg, P. V., and Laird, P. W. (1999). CpG island hypermethylation in human colorectal tumors is not associated with DNA methyltransferase overexpression. *Cancer Res* 59, 2302-2306.
- Eisen, M. B., Spellman, P. T., Brown, P. O., and Botstein, D. (1998). Cluster analysis and display of genome-wide expression patterns. *Proc Natl Acad Sci U S A* 95, 14863-14868.
- Favaro, R., Valotta, M., Ferri, A. L., Latorre, E., Mariani, J., Giachino, C., Lancini, C., Tosetti, V., Ottolenghi, S., Taylor, V., and Nicolis, S. K. (2009). Hippocampal development and neural stem cell maintenance require Sox2-dependent regulation of Shh. *Nat Neurosci* 12, 1248-1256.
- Ghizon, R., McCulloch, C. A., and Zohar, R. (1999). Stromal mesenchymal progenitor cells. *Leuk Lymphoma* 32, 211-221.
- Girgrah, N., Ackerley, C. A., and Moscarello, M. A. (1991a). Localization of CD44 (P80) on the external surface of a human astrocytoma cell. *Neuroreport* 2, 441-444.
- Girgrah, N., Letarte, M., Becker, L. E., Cruz, T. F., Theriault, E., and Moscarello, M. A. (1991b). Localization of the CD44 glycoprotein to fibrous astrocytes in normal white matter and to reactive astrocytes in active lesions in multiple sclerosis. *J Neuropathol Exp Neurol* 50, 779-792.
- Hakala, B. E., White, C., and Recklies, A. D. (1993). Human cartilage gp-39, a major secretory product of articular chondrocytes and synovial cells, is a mammalian member of a chitinase protein family. *J Biol Chem* 268, 25803-25810.
- Hashimoto, K., Noshiro, M., Ohno, S., Kawamoto, T., Satakeda, H., Akagawa, Y., Nakashima, K., Okimura, A., Ishida, H., Okamoto, T., et al. (1997). Characterization of a cartilage-derived 66-kDa protein (RGD-CAP/beta ig-h3) that binds to collagen. *Biochim Biophys Acta* 1355, 303-314.
- Haudenschild, D. R., McPherson, J. M., Tubo, R., and Binette, F. (2001). Differential expression of multiple genes during articular chondrocyte redifferentiation. *Anat Rec* 263, 91-98.
- Hennen, E., Czopka, T., and Faissner, A. (2011). Structurally distinct LewisX glycans distinguish subpopulations of neural stem/progenitor cells. *J Biol Chem* 286, 16321-16331.
- Kang, P., Lee, H. K., Glasgow, S. M., Finley, M., Donti, T., Gaber, Z. B., Graham, B. H., Foster, A. E., Novitch, B. G., Gronostajski, R. M., and Deneen, B. (2012). Sox9 and NFIA coordinate a transcriptional regulatory cascade during the initiation of gliogenesis. *Neuron* 74, 79-94.
- Kuppner, M. C., Van Meir, E., Gauthier, T., Hamou, M. F., and de Tribolet, N. (1992). Differential expression of the CD44 molecule in human brain tumours. *Int J Cancer* 50, 572-577.

- Kusumi, K., Dunwoodie, S. L., and Krumlauf, R. (2001). Dynamic expression patterns of the pudgy/spondylocostal dysostosis gene *Dll3* in the developing nervous system. *Mech Dev* 100, 141-144.
- Kusumi, K., Mimoto, M. S., Covello, K. L., Beddington, R. S., Krumlauf, R., and Dunwoodie, S. L. (2004). *Dll3* pudgy mutation differentially disrupts dynamic expression of somite genes. *Genesis* 39, 115-121.
- Kuvaja, P., Hulkkonen, S., Pasanen, I., Soini, Y., Lehtonen, S., Talvensaaari-Mattila, A., Paakko, P., Kaakinen, M., Autio-Harminen, H., Hurskainen, T., et al. (2012). Tumor tissue inhibitor of metalloproteinases-1 (TIMP-1) in hormone-independent breast cancer might originate in stromal cells, and improves stratification of prognosis together with nodal status. *Exp Cell Res* 318, 1094-1103.
- Leask, A. (2004). Transcriptional profiling of the scleroderma fibroblast reveals a potential role for connective tissue growth factor (CTGF) in pathological fibrosis. *Keio J Med* 53, 74-77.
- Lee, C. G., Hartl, D., Lee, G. R., Koller, B., Matsuura, H., Da Silva, C. A., Sohn, M. H., Cohn, L., Homer, R. J., Kozhich, A. A., et al. (2009). Role of breast regression protein 39 (BRP-39)/chitinase 3-like-1 in Th2 and IL-13-induced tissue responses and apoptosis. *J Exp Med* 206, 1149-1166.
- Lu, Q. R., Sun, T., Zhu, Z., Ma, N., Garcia, M., Stiles, C. D., and Rowitch, D. H. (2002). Common developmental requirement for Olig function indicates a motor neuron/oligodendrocyte connection. *Cell* 109, 75-86.
- Lu, Q. R., Yuk, D., Alberta, J. A., Zhu, Z., Pawlitzky, I., Chan, J., McMahon, A. P., Stiles, C. D., and Rowitch, D. H. (2000). Sonic hedgehog--regulated oligodendrocyte lineage genes encoding bHLH proteins in the mammalian central nervous system. *Neuron* 25, 317-329.
- Madhavan, S., Zenklusen, J.C., Kotliarov, Y., Sahni, H., Fine, H.A., Buetow, K. (2009). Rembrandt: helping personalized medicine become a reality through integrative translational research. *Mol Cancer Res*. 7: 157-167.
- Mao, Y., and Schwarzbauer, J. E. (2005). Fibronectin fibrillogenesis, a cell-mediated matrix assembly process. *Matrix Biol* 24, 389-399.
- Mayer-Proschel, M., Kalyani, A. J., Mujtaba, T., and Rao, M. S. (1997). Isolation of lineage-restricted neuronal precursors from multipotent neuroepithelial stem cells. *Neuron* 19, 773-785.
- Mayrand, D., Laforce-Lavoie, A., Laroche, S., Langlois, A., Genest, H., Roy, M., and Moulin, V. J. (2012). Angiogenic properties of myofibroblasts isolated from normal human skin wounds. *Angiogenesis* 15, 199-212.
- Mosher, D. F. (1984). Physiology of fibronectin. *Annu Rev Med* 35, 561-575.
- Nakanishi, T., Nishida, T., Shimo, T., Kobayashi, K., Kubo, T., Tamatani, T., Tezuka, K., and Takigawa, M. (2000). Effects of CTGF/Hcs24, a product of a hypertrophic chondrocyte-specific gene, on the proliferation and differentiation of chondrocytes in culture. *Endocrinology* 141, 264-273.

Narumoto, O., Matsuo, Y., Sakaguchi, M., Shoji, S., Yamashita, N., Schubert, D., Abe, K., Horiguchi, K., and Nagase, T. (2012). Suppressive effects of a pyrazole derivative of curcumin on airway inflammation and remodeling. *Exp Mol Pathol* 93, 18-25.

Ohno, S., Doi, T., Tsutsumi, S., Okada, Y., Yoneno, K., Kato, Y., and Tanne, K. (2002). RGD-CAP ((beta)ig-h3) is expressed in precartilaginous condensation and in prehypertrophic chondrocytes during cartilage development. *Biochim Biophys Acta* 1572, 114-122.

Olah, M., Raj, D., Brouwer, N., De Haas, A. H., Eggen, B. J., Den Dunnen, W. F., Biber, K. P., and Boddeke, H. W. (2012). An optimized protocol for the acute isolation of human microglia from autopsy brain samples. *Glia* 60, 96-111.

Ostanin, A. A., Petrovskii, Y. L., Shevela, E. Y., and Chernykh, E. R. (2011). Multiplex analysis of cytokines, chemokines, growth factors, MMP-9 and TIMP-1 produced by human bone marrow, adipose tissue, and placental mesenchymal stromal cells. *Bull Exp Biol Med* 151, 133-141.

Parras, C. M., Hunt, C., Sugimori, M., Nakafuku, M., Rowitch, D., and Guillemot, F. (2007). The proneural gene *Mash1* specifies an early population of telencephalic oligodendrocytes. *J Neurosci* 27, 4233-4242.

Parsons, D. W., Jones, S., Zhang, X., Lin, J. C., Leary, R. J., Angenendt, P., Mankoo, P., Carter, H., Siu, I. M., Gallia, G. L., *et al.* (2008). An integrated genomic analysis of human glioblastoma multiforme. *Science* 321, 1807-1812.

Pennartz, S., Belvindrah, R., Tomiuk, S., Zimmer, C., Hofmann, K., Conradt, M., Bosio, A., and Cremer, H. (2004). Purification of neuronal precursors from the adult mouse brain: comprehensive gene expression analysis provides new insights into the control of cell migration, differentiation, and homeostasis. *Mol Cell Neurosci* 25, 692-706.

Pruszek, J., Ludwig, W., Blak, A., Alavian, K., and Isacson, O. (2009). CD15, CD24, and CD29 define a surface biomarker code for neural lineage differentiation of stem cells. *Stem Cells* 27, 2928-2940.

Read, T. A., Fogarty, M. P., Markant, S. L., McLendon, R. E., Wei, Z., Ellison, D. W., Febbo, P. G., and Wechsler-Reya, R. J. (2009). Identification of CD15 as a marker for tumor-propagating cells in a mouse model of medulloblastoma. *Cancer Cell* 15, 135-147.

Ross, S. E., Greenberg, M. E., and Stiles, C. D. (2003). Basic helix-loop-helix factors in cortical development. *Neuron* 39, 13-25.

Samarakoon, R., Overstreet, J. M., Higgins, S. P., and Higgins, P. J. (2012). TGF-beta1 --> SMAD/p53/USF2 --> PAI-1 transcriptional axis in ureteral obstruction-induced renal fibrosis. *Cell Tissue Res* 347, 117-128.

Scott, C. E., Wynn, S. L., Sesay, A., Cruz, C., Cheung, M., Gomez Gavero, M. V., Booth, S., Gao, B., Cheah, K. S., Lovell-Badge, R., and Briscoe, J. (2010). SOX9 induces and maintains neural stem cells. *Nat Neurosci* 13, 1181-1189.

Stolt, C. C., Lommes, P., Sock, E., Chaboissier, M. C., Schedl, A., and Wegner, M. (2003). The Sox9 transcription factor determines glial fate choice in the developing spinal cord. *Genes Dev* 17, 1677-1689.

Stolt, C. C., Rehberg, S., Ader, M., Lommes, P., Riethmacher, D., Schachner, M., Bartsch, U., and Wegner, M. (2002). Terminal differentiation of myelin-forming oligodendrocytes depends on the transcription factor Sox10. *Genes Dev* 16, 165-170.

Sugiura, Y., Ma, L., Sun, B., Shimada, H., Laug, W. E., Seeger, R. C., and DeClerck, Y. A. (1999). The plasminogen-plasminogen activator (PA) system in neuroblastoma: role of PA inhibitor-1 in metastasis. *Cancer Res* 59, 1327-1336.

Sun, S., Guo, Z., Xiao, X., Liu, B., Liu, X., Tang, P. H., and Mao, N. (2003). Isolation of mouse marrow mesenchymal progenitors by a novel and reliable method. *Stem Cells* 21, 527-535.

Takebayashi, H., Nabeshima, Y., Yoshida, S., Chisaka, O., and Ikenaka, K. (2002). The basic helix-loop-helix factor olig2 is essential for the development of motoneuron and oligodendrocyte lineages. *Curr Biol* 12, 1157-1163.

Taranova, O. V., Magness, S. T., Fagan, B. M., Wu, Y., Surzenko, N., Hutton, S. R., and Pevny, L. H. (2006). SOX2 is a dose-dependent regulator of retinal neural progenitor competence. *Genes Dev* 20, 1187-1202.

TCGA. (2008) Comprehensive genomic characterization defines human glioblastoma genes and core pathways. *Nature* 455, 1061-1068.

Thiery, J. P., Duband, J. L., Rutishauser, U., and Edelman, G. M. (1982). Cell adhesion molecules in early chicken embryogenesis. *Proc Natl Acad Sci U S A* 79, 6737-6741.

Ueno, T., Ito, J., Hoshikawa, S., Ohori, Y., Fujiwara, S., Yamamoto, S., Ohtsuka, T., Kageyama, R., Akai, M., Nakamura, K., and Ogata, T. (2012). The identification of transcriptional targets of Ascl1 in oligodendrocyte development. *Glia* 60, 1495-1505.

Wegner, M., and Stolt, C. C. (2005). From stem cells to neurons and glia: a Soxist's view of neural development. *Trends Neurosci* 28, 583-588.

Yoon, K., and Gaiano, N. (2005). Notch signaling in the mammalian central nervous system: insights from mouse mutants. *Nat Neurosci* 8, 709-715.

Yuan, S. H., Martin, J., Elia, J., Flippin, J., Paramban, R. I., Hefferan, M. P., Vidal, J. G., Mu, Y., Killian, R. L., Israel, M. A., et al. (2011). Cell-surface marker signatures for the isolation of neural stem cells, glia and neurons derived from human pluripotent stem cells. *PLoS One* 6, e17540.



Zhao, X., D, D. A., Lim, W. K., Brahmachary, M., Carro, M. S., Ludwig, T., Cardo, C. C., Guillemot, F., Aldape, K., Califano, A., et al. (2009). The N-Myc-DLL3 cascade is suppressed by the ubiquitin ligase Huwe1 to inhibit proliferation and promote neurogenesis in the developing brain. *Dev Cell* 17, 210-221.

Zhou, Q., and Anderson, D. J. (2002). The bHLH transcription factors OLIG2 and OLIG1 couple neuronal and glial subtype specification. *Cell* 109, 61-73.

Zhou, Q., Wang, S., and Anderson, D. J. (2000). Identification of a novel family of oligodendrocyte lineage-specific basic helix-loop-helix transcription factors. *Neuron* 25, 331-343.

Zohar, R., Cheifetz, S., McCulloch, C. A., and Sodek, J. (1998). Analysis of intracellular osteopontin as a marker of osteoblastic cell differentiation and mesenchymal cell migration. *Eur J Oral Sci* 106 Suppl 1, 401-407.
